# Supplementary material for: Hydrogen adsorption on and spillover from Au- and Cu-supported Pt3 and Pd3 clusters: a density functional study
Source: Royal Society of Chemistry journal article supplement (doi:10.1039/c2cp43080k), 2012-01-01
Supplement: c2cp43080k.pdf [file c2cp43080k.pdf]

## Electronic Supplementary Information

### Hydrogen Adsorption on and Spillover from Au- and Cu-Supported Pt<sub>3</sub> and Pd<sub>3</sub> Clusters: A Density Functional Study

Juan A. Santana<sup>a</sup> and Notker Rösch<sup>\*ab</sup>

<sup>a</sup> *Department Chemie & Catalysis Research Center, Technische Universität München,  
85747 Garching, Germany*

<sup>b</sup> *Institute of High Performance Computing, Agency for Science, Technology and Research,  
1 Fusionopolis Way, #16-16 Connexis, Singapore 138632, Singapore*

**Table S1.** Properties of hydrogen adsorbed on clusters Pt<sub>3</sub> and Pd<sub>3</sub> clusters, supported on a metal or in the gas phase.<sup>a</sup>

| System                   | Site                    | $\Delta(\langle M_C-M_C \rangle)$ | $\Delta(\langle M_C-M_{S1} \rangle)$ | $\nu$                             |
|--------------------------|-------------------------|-----------------------------------|--------------------------------------|-----------------------------------|
| Pt <sub>3</sub>          | top                     | 0.03                              | –                                    | 2238, 534, 286                    |
|                          | bridge                  | 0.04                              | –                                    | 1541, 652, 564                    |
|                          | three-fold <sup>b</sup> | 0.06                              | –                                    | 1418, 156, 59 <i>i</i>            |
| Pd <sub>3</sub>          | three-fold              | 0.07                              | –                                    | 1266, 751, 675                    |
|                          | bridge                  | 0.06                              | –                                    | 1436, 1148, 181                   |
| Pt <sub>3</sub> /Au(111) | top                     | 0.03                              | –                                    | 2157, 344, 210                    |
|                          | rim 1                   | 0.01                              | -0.01                                | 2184, 445, 431                    |
|                          | bridge                  | 0.05                              | -0.01                                | 1431, 953, 396                    |
|                          | top <sup>b</sup>        | 0.00                              | 0.01                                 | 2243, 255, 90 <i>i</i>            |
|                          | rim 2 <sup>b</sup>      | 0.01                              | -0.01                                | 1673, 1035, 288 <i>i</i>          |
| Pd <sub>3</sub> /Au(111) | three-fold              | 0.08                              | -0.02                                | 1196, 536, 489                    |
|                          | three-fold              | 0.07                              | 0.00                                 | 947, 879, 876                     |
|                          | bridge                  | 0.04                              | 0.01                                 | 1294, 1206, 275                   |
|                          | rim 2                   | 0.01                              | 0.00                                 | 1375, 1059, 226                   |
|                          | rim 1 <sup>b</sup>      | 0.01                              | 0.00                                 | 1999, 243, 112 <i>i</i>           |
| Pt <sub>3</sub> /Cu(111) | top <sup>b</sup>        | -0.01                             | 0.01                                 | 1962, 135, 190 <i>i</i>           |
|                          | rim 1                   | 0.00                              | 0.02                                 | 2074, 460, 375                    |
|                          | bridge                  | 0.05                              | 0.03                                 | 1326, 1094, 429                   |
|                          | three-fold              | 0.09                              | 0.00                                 | 1116, 625, 595                    |
| Pd <sub>3</sub> /Cu(111) | top <sup>b</sup>        | 0.00                              | 0.02                                 | 2205, 127 <i>i</i> , 245 <i>i</i> |
|                          | three-fold              | 0.06                              | 0.02                                 | 906, 900, 889                     |
|                          | bridge                  | 0.03                              | 0.03                                 | 1329, 1137, 238                   |
|                          | rim 3                   | 0.02                              | 0.00                                 | 1237, 745, 559                    |
|                          | top <sup>b</sup>        | 0.02                              | 0.00                                 | 1927, 258 <i>i</i> , 284 <i>i</i> |

<sup>a</sup> Adsorption sites for hydrogen on Pt<sub>3</sub> and Pd<sub>3</sub> clusters, change  $\Delta$  in the average interatomic distance  $\langle M_C-M_C \rangle$  of the metal clusters after adsorption of hydrogen, change  $\Delta$  in the average interatomic distance  $\langle M_C-M_{S1} \rangle$  between the metal clusters and the substrate after adsorption of hydrogen, vibrational frequencies  $\nu$  of adsorbed hydrogen. Distances in Å and frequency in cm<sup>-1</sup>. <sup>b</sup> Conformation is not a local minimum, one or more imaginary frequencies.

**Table S2.** Properties of approximate transition states for hydrogen diffusion within metal-supported metal clusters.<sup>a</sup>

| System                   | Initial site | Final site | $\Delta E_{\text{act}}$ | $\Delta E_{\text{diff}}$ | $\langle M_{\text{C-H}} \rangle$ | $\nu$                    |
|--------------------------|--------------|------------|-------------------------|--------------------------|----------------------------------|--------------------------|
| Pt <sub>3</sub> /Au(111) | bridge       | rim 1      | 15                      | -5                       | 1.58                             | 2098, 304, 371 <i>i</i>  |
|                          | bridge       | three-fold | 19                      | 16                       | 1.80                             | 1304, 737, 223 <i>i</i>  |
| Pd <sub>3</sub> /Au(111) | bridge       | rim 2      | 58                      | 34                       | 1.60                             | 1661, 427, 234 <i>i</i>  |
|                          | bridge       | three-fold | 7                       | -15                      | 1.59                             | 1860, 1167, 543 <i>i</i> |
| Pt <sub>3</sub> /Cu(111) | bridge       | rim 1      | 20                      | -18                      | 1.59                             | 2041, 376, 477 <i>i</i>  |
|                          | bridge       | three-fold | 35                      | 22                       | 1.67                             | 1494, 1439, 497 <i>i</i> |
| Pd <sub>3</sub> /Cu(111) | bridge       | rim 3      | 28                      | 12                       | 1.65                             | 1374, 800, 254 <i>i</i>  |
|                          | bridge       | three-fold | 2                       | -10                      | 1.71                             | 1328, 1094, 217 <i>i</i> |

<sup>a</sup> Initial and final sites of adsorbed hydrogen on Pt<sub>3</sub> and Pd<sub>3</sub>, approximate activation energy  $\Delta E_{\text{act}}$  for hydrogen diffusion from initial to final site, diffusion energy  $\Delta E_{\text{diff}}$ , average nearest-neighbor distance  $\langle M_{\text{C-H}} \rangle$  between atoms of the clusters and hydrogen, vibrational frequencies  $\nu$  of hydrogen. Energies in kJ mol<sup>-1</sup>, distances in Å, frequency in cm<sup>-1</sup>.

**Table S3.** Properties of adsorbed hydrogen on substrate sites close to adsorbed Pt<sub>3</sub> and Pd<sub>3</sub> clusters.<sup>a</sup>

| System                                | Site | $\Delta E_{\text{ads}}$ | $M_{\text{C-H}}$ |
|---------------------------------------|------|-------------------------|------------------|
| Pt <sub>3</sub> /Au(111)              | 4    | 19                      | 3.37             |
| Pd <sub>3</sub> /Au(111)              | 4    | 17                      | 3.34             |
| Pt <sub>3</sub> /Cu(111)              | 4    | -3                      | 2.64             |
| Pd <sub>3</sub> /Cu(111)              | 4    | -7                      | 2.69             |
| Pt <sub>3</sub> /Au(111) <sup>b</sup> | 1    | 42                      | 2.19             |
|                                       | 2    | 38                      | 3.27             |
|                                       | 3    | 14                      | 4.69             |
| Pt <sub>3</sub> /Au(111) <sup>c</sup> | 1    | 78                      | 2.19             |
|                                       | 2    | 43                      | 3.27             |
|                                       | 3    | 27                      | 4.69             |

<sup>a</sup> Adsorption sites of hydrogen on the substrate, hydrogen adsorption energy  $\Delta E_{\text{ads}}$ , distance  $M_{\text{C-H}}$  between adsorbed hydrogen and the nearest atom of the adsorbed cluster. Energies relative to  $\frac{1}{2}\text{H}_2$  Energy in kJ mol<sup>-1</sup> and distances in Å. The distance between hydrogen and the substrate,  $M_{\text{S-H}}$ , was fixed to the equilibrium distances 1.75 Å for hydrogen on clean Cu(111) and 1.90 Å for hydrogen on clean Au(111). <sup>b</sup> Results from calculations with a six-layer slab model of the substrate. <sup>c</sup> Results from calculations with a (4×4) surface cell and a four-layer slab model of the substrate.

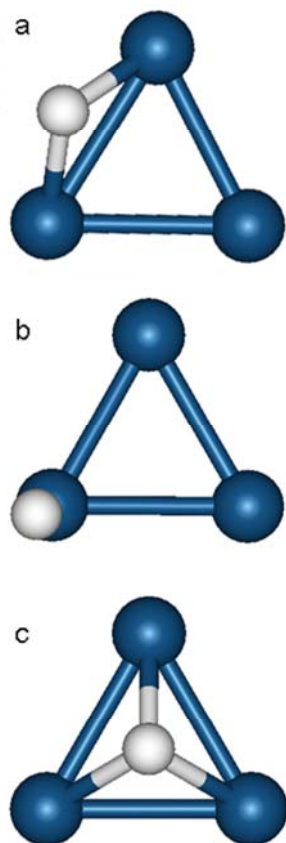

**Figure S1.** Sketch showing the geometries of hydrogen adsorbed on a triangular cluster: a) bridge, b) top, and c) three-fold hollow site.

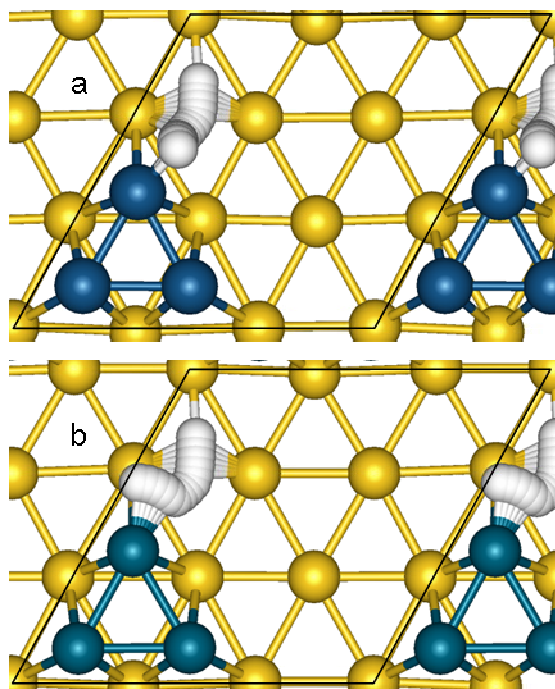

**Figure S2.** Hydrogen diffusion pathway from site rim 1 ( $\text{Pt}_3$ ) and rim 2 ( $\text{Pd}_3$ ) to site 4 on a)  $\text{Pt}_3/\text{Au}(111)$  and b)  $\text{Pd}_3/\text{Au}(111)$ .

## Cartesian Coordinates of Stationary Points

Cartesian coordinates of all systems studied are listed as they appear in the tables of the main document.

The two “bottom” atomic layers of the surface models kept fixed during geometry optimization are included separately (au\_2fixed\_layers, cu\_2fixed\_layers). Only the two top-most optimized layers of the surfaces are include for each system.

|          |                      |            |
|----------|----------------------|------------|
| <b>1</b> | <b>Table 1</b>       | <b>S7</b>  |
| 1.1      | pt3_gas              | S7         |
| 1.2      | pt3_gas-h_top        | S7         |
| 1.3      | pt3_gas-h_bridge     | S7         |
| 1.4      | pt3_gas-h_three-fold | S7         |
| 1.5      | pd3_gas              | S7         |
| 1.6      | pd3_gas-h_three-fold | S7         |
| 1.7      | pd3_gas-h_bridge     | S7         |
| 1.8      | pd3_gas_top          | S7         |
| 1.9      | au_2fixed_layers     | S7         |
| 1.10     | pt3_au               | S7         |
| 1.11     | pt3_au-h_rim1        | S8         |
| 1.12     | pt3_au-h_bridge      | S8         |
| 1.13     | pt3_au-h_top         | S8         |
| 1.14     | pt3_au-h_rim2        | S9         |
| 1.15     | pt3_au-h_three-fold  | S9         |
| 1.16     | pd3_au               | S9         |
| 1.17     | pd3_au-h_three-fold  | S10        |
| 1.18     | pd3_au-h_bridge      | S10        |
| 1.19     | pd3_au-h_rim2        | S10        |
| 1.20     | pd3_au-h_rim1        | S11        |
| 1.21     | pd3_au-h_top         | S11        |
| 1.22     | cu_2fixed_layers     | S11        |
| 1.23     | pt3_cu               | S12        |
| 1.24     | pt3_cu-h_rim1        | S12        |
| 1.25     | pt3_cu-h_bridge      | S12        |
| 1.26     | pt3_cu-h_three-fold  | S13        |
| 1.27     | pt3_cu-h_top         | S13        |
| 1.28     | pd3_cu               | S13        |
| 1.29     | pd3_cu-h_three-fold  | S14        |
| 1.30     | pd3_cu-h_bridge      | S14        |
| 1.31     | pd3_cu-h_rim3        | S14        |
| 1.32     | pd3_cu-h_top         | S15        |
| <b>2</b> | <b>Table 2</b>       | <b>S16</b> |
| 2.1      | pt3_au-h_au-site1    | S16        |
| 2.2      | pt3_au-h_au-site2    | S16        |
| 2.3      | pt3_au-h_au-site3    | S16        |
| 2.4      | pd3_au-h_au-site1    | S17        |
| 2.5      | pd3_au-h_au-site2    | S17        |

|          |                                        |            |
|----------|----------------------------------------|------------|
| 2.6      | pd3_au-h_au-site3 .....                | S17        |
| 2.7      | pt3_cu-h_cu-site1 .....                | S18        |
| 2.8      | pt3_cu-h_cu-site2 .....                | S18        |
| 2.9      | pt3_cu-h_cu-site3 .....                | S18        |
| 2.10     | pd3_cu-h_cu-site1 .....                | S19        |
| 2.11     | pd3_cu-h_cu-site2 .....                | S19        |
| 2.12     | pd3_cu-h_cu-site3 .....                | S19        |
| 2.13     | au-h_fcc .....                         | S20        |
| 2.14     | cu-h_fcc .....                         | S20        |
| <b>3</b> | <b>Table 3.....</b>                    | <b>S21</b> |
| 3.1      | pt3_au-h_rim1_to_au-site4_TS .....     | S21        |
| 3.2      | pd3_au-h_rim2_to_au-site4_TS .....     | S21        |
| 3.3      | pt3_cu-h_rim1_to_cu-site4_TS .....     | S21        |
| 3.4      | pd3_cu-h_rim3_to_cu-site4_TS .....     | S22        |
| <b>4</b> | <b>Table S2.....</b>                   | <b>S23</b> |
| 4.1      | pt3_au-h_bridge_to_rim1_TS .....       | S23        |
| 4.2      | pt3_au-h_bridge_to_three-fold_TS ..... | S23        |
| 4.3      | pd3_au-h_bridge_to_rim2_TS.....        | S23        |
| 4.4      | pd3_au-h_bridge_to_three-fold_TS ..... | S24        |
| 4.5      | pt3_cu-h_bridge_to_rim1_TS .....       | S24        |
| 4.6      | pt3_cu-h_bridge_to_three-fold_TS ..... | S24        |
| 4.7      | pd3_cu-h_bridge_to_rim3_TS.....        | S25        |
| 4.8      | pd3_cu-h_bridge_to_three-fold_TS ..... | S25        |
| <b>5</b> | <b>Table S3.....</b>                   | <b>S26</b> |
| 5.1      | pt3_au-h_au-site4 .....                | S26        |
| 5.2      | pd3_au-h_au-site4 .....                | S26        |
| 5.3      | pt3_cu-h_cu-site4 .....                | S26        |
| 5.4      | pd3_cu-h_cu-site4 .....                | S27        |
| 5.5      | pt3_au_6layers.....                    | S27        |
| 5.6      | pt3_au_6layers-h_au-site1 .....        | S28        |
| 5.7      | pt3_au_6layers-h_au-site2.....         | S28        |
| 5.8      | pt3_au_6layers-h_au-site3.....         | S28        |
| 5.9      | pt3_au4x4 .....                        | S29        |
| 5.10     | pt3_au4x4-h_au-site1 .....             | S30        |
| 5.11     | pt3_au4x4-h_au-site2 .....             | S30        |
| 5.12     | pt3_au4x4-h_au-site3 .....             | S31        |

**1 Table 1**

|                                 |                   |                   |                   |
|---------------------------------|-------------------|-------------------|-------------------|
| <i>1.1 pt3_gas</i>              |                   |                   |                   |
| Pt                              | 9.40318760843739  | 7.15688715126569  | 12.55000000000008 |
| Pt                              | 10.64855924108518 | 4.99982907564507  | 12.55000000000008 |
| Pt                              | 8.15780715047737  | 4.99982377308924  | 12.55000000000008 |
| <i>1.2 pt3_gas-h_top</i>        |                   |                   |                   |
| H                               | 7.92854298930410  | 4.87178614620980  | 13.95195141126165 |
| Pt                              | 9.35617218713125  | 7.22824773246165  | 12.11921243249094 |
| Pt                              | 10.68357438780149 | 4.92929603914049  | 12.11757288185060 |
| Pt                              | 8.07923254161892  | 4.95828425750443  | 12.39976796095789 |
| <i>1.3 pt3_gas-h_bridge</i>     |                   |                   |                   |
| H                               | 1.28571292580108  | -0.36184093598323 | 1.14433591027688  |
| Pt                              | 0.00000000000000  | 0.00000000000000  | 0.00000000000000  |
| Pt                              | 2.54378872106259  | 0.00000000000000  | 0.00000000000000  |
| Pt                              | 1.27263369079887  | 2.17762072007048  | 0.00000000000000  |
| <i>1.4 pt3_gas-h_three-fold</i> |                   |                   |                   |
| H                               | 1.27300000000002  | 0.74400000000003  | 1.07709983049825  |
| Pt                              | 0.00000000000000  | 0.00000000000000  | 0.00000000000000  |
| Pt                              | 2.55177360641509  | 0.00000000000000  | 0.00000000000000  |
| Pt                              | 1.26939088511478  | 2.21158141762700  | 0.00000000000000  |
| <i>1.5 pd3_gas</i>              |                   |                   |                   |
| Pd                              | 4.01324600000001  | 4.78967727863592  | 1.88001900000003  |
| Pd                              | 5.26501452476648  | 2.61344786068207  | 1.88001900000003  |
| Pd                              | 2.76146847523347  | 2.61344286068208  | 1.88001900000003  |
| <i>1.6 pd3_gas-h_three-fold</i> |                   |                   |                   |
| H                               | 1.27300000000002  | 0.74400000000003  | 0.99398291274336  |
| Pd                              | 0.00000000000000  | 0.00000000000000  | 0.00000000000000  |
| Pd                              | 2.57716552561074  | 0.00000000000000  | 0.00000000000000  |
| Pd                              | 1.28012494293159  | 2.23065383919390  | 0.00000000000000  |
| <i>1.7 pd3_gas-h_bridge</i>     |                   |                   |                   |
| H                               | 8.44877708774088  | 6.26954734905125  | 13.23167096486370 |
| Pd                              | 9.20578992833684  | 7.33348043483416  | 12.16540459655219 |
| Pd                              | 10.50075355205223 | 5.13869349175684  | 12.10276960339952 |
| Pd                              | 7.95343838572079  | 5.05264152948502  | 12.17553217669437 |
| <i>1.8 pd3_gas_top</i>          |                   |                   |                   |
| H                               | 0.00000000000000  | 0.00000000000000  | 1.51734995877727  |
| Pd                              | 0.00000000000000  | 0.00000000000000  | 0.00000000000000  |
| Pd                              | 2.53844984310741  | 0.00000000000000  | 0.00000000000000  |
| Pd                              | 1.26315746486398  | 2.20010156709611  | 0.00000000000000  |
| <i>1.9 au_2fixed_layers</i>     |                   |                   |                   |
| Au                              | 10.87900700000000 | 4.86678000000002  | 5.32010000000004  |
| Au                              | 4.97582700000000  | 4.86676900000000  | 5.32010000000004  |
| Au                              | 9.40320800000002  | 2.31061899999998  | 5.32010000000004  |
| Au                              | 6.45157400000000  | 2.31063900000000  | 5.32010000000004  |
| Au                              | 7.92737400000002  | 4.86679999999998  | 5.32010000000004  |
| Au                              | 3.50002699999999  | 2.31060800000002  | 5.32010000000004  |
| Au                              | 12.35480900000002 | 7.42294100000000  | 5.32010000000004  |
| Au                              | 9.40317300000000  | 7.42296000000001  | 5.32010000000004  |
| Au                              | 6.45162700000002  | 7.42292999999998  | 5.32010000000004  |
| Au                              | 7.92736799999998  | 1.45858900000001  | 2.91009999999997  |
| Au                              | 10.87896700000004 | 6.57091000000002  | 2.91009999999997  |
| Au                              | 6.45162100000004  | 4.01471900000002  | 2.91009999999997  |
| Au                              | 4.97578600000004  | 6.57090000000001  | 2.91009999999997  |
| Au                              | 9.40316799999999  | 4.01474999999999  | 2.91009999999997  |
| Au                              | 4.97582099999999  | 1.45855899999999  | 2.91009999999997  |
| Au                              | 2.02418599999998  | 1.45857800000000  | 2.91009999999997  |
| Au                              | 7.92742099999999  | 6.57088000000000  | 2.91009999999997  |
| Au                              | 3.49998699999999  | 4.01473899999998  | 2.91009999999997  |
| <i>1.10 pt3_au</i>              |                   |                   |                   |
| Pt                              | 9.41000567537797  | 7.23846706688116  | 12.20532326549838 |
| Pt                              | 10.72118078025244 | 4.97176118567258  | 12.20717618361868 |
| Pt                              | 8.10538858983690  | 4.97157228333583  | 12.20405314290107 |
| Au                              | 7.92980864603329  | 1.46272694906535  | 10.13317784144126 |
| Au                              | 4.97882770047342  | 6.57200594885900  | 10.13346822108581 |
| Au                              | 4.97956911168102  | 1.53165050424642  | 10.30464027152979 |
| Au                              | 6.40461528394440  | 3.98835977781809  | 10.30654175234542 |
| Au                              | 11.01110797933591 | 6.65175471280656  | 10.04950799879210 |

|                             |                   |                  |                   |
|-----------------------------|-------------------|------------------|-------------------|
| Au                          | 9.41223055871118  | 3.87177892827019 | 10.04910856391772 |
| Au                          | 2.02457373999724  | 1.45931329284689 | 10.13091953471050 |
| Au                          | 7.80598885226248  | 6.65066496651894 | 10.04722158559325 |
| Au                          | 3.56216517626263  | 3.98934754729607 | 10.30568717139095 |
| Au                          | 6.43494705885043  | 0.61642347199435 | 7.71288058418509  |
| Au                          | 9.40141458722578  | 5.71827701902447 | 7.72832372670553  |
| Au                          | 3.49879704420908  | 5.70148989422936 | 7.71396037348655  |
| Au                          | 4.97662153287733  | 3.16610780886085 | 7.79105958777095  |
| Au                          | 7.91287869383096  | 3.16899133017057 | 7.71473937233205  |
| Au                          | 3.51459659911758  | 0.61882526645098 | 7.71282454513785  |
| Au                          | 0.54583619293272  | 0.60594295352603 | 7.70932818180753  |
| Au                          | 6.44892284011308  | 5.70132784317698 | 7.71421274301878  |
| Au                          | 2.04092974757702  | 3.17237578084701 | 7.71395407271568  |
| <i>1.11 pt3_au-h_rim1</i>   |                   |                  |                   |
| H                           | 6.62622670906057  | 5.34328402397803 | 12.78846172566860 |
| Pt                          | 9.41331712359191  | 7.27530056793345 | 12.19485188830209 |
| Pt                          | 10.70407974178066 | 4.99953943303764 | 12.16450486561723 |
| Pt                          | 8.04712384756374  | 5.02024024828793 | 12.19069473850714 |
| Au                          | 7.95581663244760  | 1.49037346288141 | 10.13868826089229 |
| Au                          | 5.00751420211028  | 6.62564634574682 | 10.11053121814071 |
| Au                          | 5.00292004096868  | 1.56115055106705 | 10.30551562223405 |
| Au                          | 6.40181076087876  | 4.01159097167805 | 10.27834351936242 |
| Au                          | 11.03369714056492 | 6.68322672705583 | 10.04310937908988 |
| Au                          | 9.42321896230352  | 3.89291813642643 | 10.03405274905984 |
| Au                          | 2.05190455622012  | 1.49580483399886 | 10.16359427588196 |
| Au                          | 7.84223002009252  | 6.68605034374609 | 10.02076896545781 |
| Au                          | 3.55158101790307  | 4.00818201766610 | 10.28579139500390 |
| Au                          | 6.45733217995809  | 0.63616101403954 | 7.70731511091342  |
| Au                          | 9.42701520307449  | 5.73846049159026 | 7.71899207374708  |
| Au                          | 3.53108549962472  | 5.71953198966028 | 7.71245881340259  |
| Au                          | 4.99441859643025  | 3.18860073304051 | 7.79656954672452  |
| Au                          | 7.93173037268659  | 3.18643672078713 | 7.71227154578364  |
| Au                          | 3.53273368534457  | 0.64474978118818 | 7.70620770778577  |
| Au                          | 0.57389256859172  | 0.63452111970071 | 7.70873698302028  |
| Au                          | 6.47496715363659  | 5.71618883147200 | 7.70844679581668  |
| Au                          | 2.06265699388969  | 3.18746717503238 | 7.69857714950467  |
| <i>1.12 pt3_au-h_bridge</i> |                   |                  |                   |
| H                           | 8.08685997652059  | 6.47455048077105 | 13.11602877705511 |
| Pt                          | 9.33116447023134  | 7.32375549678283 | 12.23780353838010 |
| Pt                          | 10.67087665698953 | 5.02847836854905 | 12.07971362588672 |
| Pt                          | 8.01985785010922  | 4.96757845902435 | 12.24183140018866 |
| Au                          | 7.94394477861773  | 1.47324388832260 | 10.15521791175976 |
| Au                          | 4.96053955181115  | 6.58062590285137 | 10.14534089048016 |
| Au                          | 4.98899717368345  | 1.55303796274551 | 10.29006520685000 |
| Au                          | 6.39988246351926  | 3.99447811595427 | 10.28102928976832 |
| Au                          | 10.97266864794395 | 6.72201889964084 | 10.02250914448043 |
| Au                          | 9.36989763925673  | 3.87344968547199 | 10.02652832406227 |
| Au                          | 2.02913113518678  | 1.46980127281678 | 10.14473069752843 |
| Au                          | 7.81619827576421  | 6.63899698784995 | 10.04264505117409 |
| Au                          | 3.55577468723638  | 4.00173823231178 | 10.30405777496602 |
| Au                          | 6.44745490303166  | 0.63672927914945 | 7.69804157347379  |
| Au                          | 9.41117519783769  | 5.72064145500375 | 7.71656434956210  |
| Au                          | 3.50242355277403  | 5.70253210435048 | 7.71347527707008  |
| Au                          | 4.97499128688551  | 3.17718905788003 | 7.78651814190335  |
| Au                          | 7.91367004551107  | 3.16919268744897 | 7.70296429229469  |
| Au                          | 3.52676735669868  | 0.62361126701884 | 7.72115686587451  |
| Au                          | 0.55449295572483  | 0.60635325944308 | 7.72298815935753  |
| Au                          | 6.45352580306366  | 5.70582504462041 | 7.71842015627629  |
| Au                          | 2.05387281147419  | 3.16884180901933 | 7.70813898487632  |
| <i>1.13 pt3_au-h_top</i>    |                   |                  |                   |
| H                           | 7.92854298930412  | 4.87178614620982 | 13.95195141126162 |
| Pt                          | 9.35617218713125  | 7.22824773246164 | 12.11921243249101 |
| Pt                          | 10.68357438780150 | 4.92929603914049 | 12.11757288185066 |
| Pt                          | 8.07923254161891  | 4.95828425750445 | 12.39976796095798 |
| Au                          | 7.93804232824591  | 1.46015234680945 | 10.13861856964490 |
| Au                          | 4.97828757003566  | 6.58243030896856 | 10.13864724852342 |
| Au                          | 5.00452558306512  | 1.54993694298054 | 10.30725010794107 |
| Au                          | 6.43184692692808  | 4.00783710267767 | 10.35912986149465 |
| Au                          | 11.02622683901784 | 6.66051069748036 | 10.02876538608240 |



|                                 |                   |                  |                   |
|---------------------------------|-------------------|------------------|-------------------|
| Au                              | 9.34057882458148  | 3.89189130169013 | 10.04333961336867 |
| Au                              | 2.04666905268162  | 1.47915083402677 | 10.13929157502483 |
| Au                              | 7.78434281457742  | 6.58928754963018 | 10.04471960630561 |
| Au                              | 3.59003603922458  | 3.99504014567981 | 10.30952881769364 |
| Au                              | 6.44173855332294  | 0.62448948802737 | 7.70416599567493  |
| Au                              | 9.40649843372581  | 5.72418935941503 | 7.72393003690062  |
| Au                              | 3.50681151523591  | 5.70420469918010 | 7.70452987863441  |
| Au                              | 4.98768588247557  | 3.17384513213829 | 7.80257493573971  |
| Au                              | 7.91381752204461  | 3.17067721270434 | 7.71045516029403  |
| Au                              | 3.52855394968721  | 0.63624121415872 | 7.71949189504844  |
| Au                              | 0.55890267779229  | 0.61314276784606 | 7.71982980584996  |
| Au                              | 6.45191018930739  | 5.70376041029879 | 7.71062567434306  |
| Au                              | 2.05911221771227  | 3.17835198064146 | 7.71852669235489  |
| <i>1.14 pt3_au-h_rim2</i>       |                   |                  |                   |
| H                               | 6.66601500000002  | 4.09951799999999 | 12.05902600000005 |
| Pt                              | 9.41360300000001  | 7.27168900000002 | 12.19545300000004 |
| Pt                              | 10.70496700000000 | 5.00149100000001 | 12.16769000000002 |
| Pt                              | 8.04945099999999  | 5.01887399999999 | 12.19397500000004 |
| Au                              | 7.95461400000001  | 1.49273899999998 | 10.13723600000006 |
| Au                              | 5.00687300000000  | 6.62482599999999 | 10.11008999999999 |
| Au                              | 5.00305900000002  | 1.56111700000001 | 10.30509699999995 |
| Au                              | 6.40244000000003  | 4.01409400000002 | 10.27844999999999 |
| Au                              | 11.03425499999998 | 6.68530299999998 | 10.04056399999995 |
| Au                              | 9.42454799999998  | 3.89402100000000 | 10.03348399999999 |
| Au                              | 2.05178300000000  | 1.49586300000002 | 10.16065300000001 |
| Au                              | 7.84077499999998  | 6.68648900000001 | 10.01938199999995 |
| Au                              | 3.55103699999998  | 4.01088399999998 | 10.28500900000003 |
| Au                              | 6.45757400000002  | 0.63721100000001 | 7.70752099999999  |
| Au                              | 9.42614000000000  | 5.73865399999999 | 7.71829599999998  |
| Au                              | 3.53006999999997  | 5.72040599999998 | 7.71182300000001  |
| Au                              | 4.99422799999998  | 3.18859900000002 | 7.79706899999999  |
| Au                              | 7.93255499999999  | 3.18822099999999 | 7.71147700000005  |
| Au                              | 3.53168199999999  | 0.64549600000002 | 7.70677500000005  |
| Au                              | 0.57326900000000  | 0.63559600000002 | 7.70829300000008  |
| Au                              | 6.47339100000000  | 5.71749799999999 | 7.70786599999994  |
| Au                              | 2.06268999999998  | 3.18712400000003 | 7.69734700000001  |
| <i>1.15 pt3_au-h_three-fold</i> |                   |                  |                   |
| H                               | 9.40649014825242  | 5.75862160394383 | 13.18770867883610 |
| Pt                              | 9.41148581562959  | 7.30996371789543 | 12.17023165789177 |
| Pt                              | 10.76597117797414 | 4.96095771037831 | 12.17312072169577 |
| Pt                              | 8.05709011617537  | 4.95939976544615 | 12.17541430024638 |
| Au                              | 7.92987438753211  | 1.46832802505286 | 10.14411212184074 |
| Au                              | 4.97990300931179  | 6.57261155555992 | 10.14597771841318 |
| Au                              | 4.98168799221974  | 1.54661112797947 | 10.27421825534793 |
| Au                              | 6.39908033831190  | 3.98938784155667 | 10.28926687312550 |
| Au                              | 11.00935577393682 | 6.65721148065780 | 10.04169708894125 |
| Au                              | 9.41014067726137  | 3.87876437973456 | 10.05145444625779 |
| Au                              | 2.02648579650464  | 1.46590492140047 | 10.14039149116244 |
| Au                              | 7.80972898307848  | 6.65558710846812 | 10.04267302488918 |
| Au                              | 3.56833617672877  | 3.98988912074600 | 10.28928183774985 |
| Au                              | 6.43471150330456  | 0.62221927823208 | 7.71086041422071  |
| Au                              | 9.40158756135717  | 5.72084990778204 | 7.72651556798637  |
| Au                              | 3.50057604050687  | 5.70275840235527 | 7.71407938810158  |
| Au                              | 4.97579094074130  | 3.16943875965243 | 7.76902558756191  |
| Au                              | 7.91163005418982  | 3.17168016976575 | 7.71642495469299  |
| Au                              | 3.51560912635056  | 0.62433946929678 | 7.71174775401353  |
| Au                              | 0.54572650290654  | 0.60673874306111 | 7.72084439128813  |
| Au                              | 6.44961026592307  | 5.70249329860622 | 7.71557660584714  |
| Au                              | 2.04129294201148  | 3.17601366901201 | 7.71532424448278  |
| <i>1.16 pd3_au</i>              |                   |                  |                   |
| Pd                              | 9.41516311924113  | 7.30955143340923 | 12.19345048945281 |
| Pd                              | 10.78154809860251 | 4.94456320502350 | 12.19333294191404 |
| Pd                              | 8.05203632749597  | 4.94440431704768 | 12.19441138445110 |
| Au                              | 7.94424092835866  | 1.45812166981507 | 10.13890140189447 |
| Au                              | 4.98085068891614  | 6.59358401328882 | 10.14101157502433 |
| Au                              | 4.98499554992078  | 1.52466972299977 | 10.20063387244499 |
| Au                              | 6.41344449863187  | 3.99790332153412 | 10.20133084191256 |
| Au                              | 10.97190450522499 | 6.62843288048769 | 10.07403187406776 |
| Au                              | 9.41343422107872  | 3.91893877318161 | 10.07883131718640 |

|                                 |                   |                  |                   |
|---------------------------------|-------------------|------------------|-------------------|
| Au                              | 2.01692204667674  | 1.45569859073270 | 10.13418802759888 |
| Au                              | 7.84860826065293  | 6.63075027155278 | 10.07701079931055 |
| Au                              | 3.55833592857953  | 3.99427023421483 | 10.20082396361105 |
| Au                              | 6.44352761690105  | 0.61124994056254 | 7.71453159381468  |
| Au                              | 9.40200896448352  | 5.71984662738668 | 7.71724778468732  |
| Au                              | 3.49885884915261  | 5.71228422089577 | 7.71455474925508  |
| Au                              | 4.97745333119143  | 3.16496123046842 | 7.73260927697047  |
| Au                              | 7.92151745010193  | 3.17112039381772 | 7.71672829490649  |
| Au                              | 3.50997495114958  | 0.61271176457321 | 7.71310633201614  |
| Au                              | 0.54664679861020  | 0.60740321023110 | 7.70821154109990  |
| Au                              | 6.45325233695139  | 5.71365991849361 | 7.71661518637292  |
| Au                              | 2.03160399960690  | 3.17102656840621 | 7.71427836558166  |
| <i>1.17 pd3_au-h_three-fold</i> |                   |                  |                   |
| H                               | 9.41703584591367  | 5.74861311167590 | 13.01412174648739 |
| Pd                              | 9.41591568767322  | 7.36517715936847 | 12.20920877967766 |
| Pd                              | 10.81885151345632 | 4.93595781030258 | 12.21479588357140 |
| Pd                              | 8.01466704033414  | 4.93534757074827 | 12.21383168143978 |
| Au                              | 7.93455644012837  | 1.46814684225614 | 10.13732023387961 |
| Au                              | 4.97952180974377  | 6.57911722212550 | 10.13807090437833 |
| Au                              | 4.98548636263441  | 1.53754673718682 | 10.18202577326434 |
| Au                              | 6.41158003709350  | 3.99958864693592 | 10.19078526898065 |
| Au                              | 10.97230535406553 | 6.63639808840193 | 10.09038946517592 |
| Au                              | 9.41252153203214  | 3.92324001596624 | 10.10075054908237 |
| Au                              | 2.02430552634757  | 1.46670743874690 | 10.13335048860605 |
| Au                              | 7.84541106281623  | 6.64071498354452 | 10.09420402715425 |
| Au                              | 3.55948744687803  | 3.99625199431651 | 10.19274985731731 |
| Au                              | 6.44089462480558  | 0.61112792246203 | 7.71958882036024  |
| Au                              | 9.40167524168280  | 5.72387462300663 | 7.72131574807535  |
| Au                              | 3.49289778714273  | 5.71373243009535 | 7.72170076835765  |
| Au                              | 4.97609731775696  | 3.16956257366205 | 7.70332794846155  |
| Au                              | 7.92385158204400  | 3.17827341294222 | 7.72340435472012  |
| Au                              | 3.51175067138104  | 0.61362139625965 | 7.71992974117970  |
| Au                              | 0.54676944691633  | 0.60935340112997 | 7.71577021004246  |
| Au                              | 6.45766083144425  | 5.71514969761541 | 7.72260720903597  |
| Au                              | 2.02795617817933  | 3.17979772009863 | 7.72266809528251  |
| <i>1.18 pd3_au-h_bridge</i>     |                   |                  |                   |
| H                               | 8.08685997652062  | 6.47455048077107 | 12.99000966670450 |
| Pd                              | 9.30536973507877  | 7.39337463792569 | 12.25299497533810 |
| Pd                              | 10.69470184925889 | 5.01500240301981 | 12.14984729535876 |
| Pd                              | 7.94118701743765  | 4.96354963636232 | 12.25075830916822 |
| Au                              | 7.93822885071458  | 1.48243475658346 | 10.14370277446253 |
| Au                              | 4.95948619326527  | 6.59010915364602 | 10.13438819389440 |
| Au                              | 4.97232338571061  | 1.54619401817725 | 10.18771464298308 |
| Au                              | 6.39483119208339  | 4.00450621191766 | 10.18356233054084 |
| Au                              | 10.94617825227775 | 6.70268101303884 | 10.08243032815595 |
| Au                              | 9.36687502102635  | 3.92578746909357 | 10.08186805945012 |
| Au                              | 2.02031464624070  | 1.47969643617790 | 10.13924737530287 |
| Au                              | 7.84483363327091  | 6.62724919174552 | 10.07042121935862 |
| Au                              | 3.52359595006000  | 4.01991862245818 | 10.21995121050605 |
| Au                              | 6.44727114102371  | 0.62352246563755 | 7.70771474912087  |
| Au                              | 9.41401235922523  | 5.72494104782156 | 7.72226568941529  |
| Au                              | 3.49663442684501  | 5.71583687834756 | 7.71952754182264  |
| Au                              | 4.96839715775898  | 3.17720113602519 | 7.72698564242476  |
| Au                              | 7.92490456737466  | 3.17869273826994 | 7.71061139985302  |
| Au                              | 3.51314310232403  | 0.61605936560626 | 7.72101206509299  |
| Au                              | 0.55253720369687  | 0.61362458802621 | 7.71577643184209  |
| Au                              | 6.45478467417408  | 5.71670563630909 | 7.71915563351973  |
| Au                              | 2.03903673848402  | 3.17885965197485 | 7.71723235054512  |
| <i>1.19 pd3_au-h_rim2</i>       |                   |                  |                   |
| H                               | 6.63090825399857  | 4.35327398857327 | 12.00709208536223 |
| Pd                              | 9.50448156866995  | 7.44277709023990 | 12.21846463340165 |
| Pd                              | 10.87697235862196 | 5.08989500885429 | 12.22026337893004 |
| Pd                              | 8.14130534163020  | 5.05483984601934 | 12.18382338220039 |
| Au                              | 7.97389009818125  | 1.54816717216482 | 10.12830001425658 |
| Au                              | 5.00749161216617  | 6.68882073248148 | 10.12141079349492 |
| Au                              | 4.99327245584173  | 1.57818051136664 | 10.16281286756220 |
| Au                              | 6.38589766226576  | 4.06325450153729 | 10.24814138562672 |
| Au                              | 11.00809056388680 | 6.72413766682922 | 10.06939879638974 |
| Au                              | 9.47292739714597  | 3.99338227595737 | 10.10393726564127 |

|                              |                   |                  |                   |
|------------------------------|-------------------|------------------|-------------------|
| Au                           | 2.04505447208233  | 1.53487750515158 | 10.13633432368656 |
| Au                           | 7.89190380364102  | 6.73251008049452 | 10.09456205671120 |
| Au                           | 3.53821154792714  | 4.07836674353060 | 10.16746951098020 |
| Au                           | 6.46986294104306  | 0.67480096941904 | 7.70231755728947  |
| Au                           | 9.42341186011057  | 5.77493042607887 | 7.72814249245811  |
| Au                           | 3.52379835438438  | 5.77332015714437 | 7.70515978361930  |
| Au                           | 5.01378213550323  | 3.23619208362913 | 7.75280569137450  |
| Au                           | 7.94353964660315  | 3.24041003521709 | 7.73671299876605  |
| Au                           | 3.52625175398312  | 0.66301274040802 | 7.70030629241876  |
| Au                           | 0.57173366884819  | 0.66772602908979 | 7.70062295879915  |
| Au                           | 6.48350075467458  | 5.76868868348759 | 7.73057411653403  |
| Au                           | 2.04590437122131  | 3.22290488900350 | 7.70109360226696  |
| <i>1.20 pd3_au-h_rim1</i>    |                   |                  |                   |
| H                            | 6.74090999999997  | 5.17327399999999 | 12.82710600000000 |
| Pd                           | 9.50448099999999  | 7.44277700000000 | 12.21846500000002 |
| Pd                           | 10.87697199999999 | 5.08989499999999 | 12.22026300000006 |
| Pd                           | 8.14130500000001  | 5.05484000000001 | 12.18382400000006 |
| Au                           | 7.97389000000002  | 1.54816700000000 | 10.12829999999999 |
| Au                           | 5.00749200000001  | 6.68882099999998 | 10.12141000000003 |
| Au                           | 4.99327200000003  | 1.57818100000001 | 10.16281299999999 |
| Au                           | 6.38589799999997  | 4.06325400000000 | 10.24814100000000 |
| Au                           | 11.00809100000001 | 6.72413800000002 | 10.06939900000006 |
| Au                           | 9.47292700000004  | 3.99338200000002 | 10.10393700000005 |
| Au                           | 2.04505400000001  | 1.53487799999999 | 10.13633400000003 |
| Au                           | 7.89190400000004  | 6.73251000000003 | 10.09456299999994 |
| Au                           | 3.53821199999999  | 4.07836700000002 | 10.16747000000007 |
| Au                           | 6.46986299999998  | 0.67480099999998 | 7.70231799999992  |
| Au                           | 9.42341200000000  | 5.77493000000000 | 7.72814199999996  |
| Au                           | 3.52379800000001  | 5.77331999999998 | 7.70516000000005  |
| Au                           | 5.01378199999996  | 3.23619199999998 | 7.75280599999996  |
| Au                           | 7.94354000000002  | 3.24041000000002 | 7.73671300000008  |
| Au                           | 3.52625199999998  | 0.66301300000002 | 7.70030600000003  |
| Au                           | 0.57173400000000  | 0.66772600000000 | 7.70062300000005  |
| Au                           | 6.48350100000004  | 5.76868900000002 | 7.73057400000005  |
| Au                           | 2.04590399999997  | 3.22290499999998 | 7.70109399999998  |
| <i>1.21 pd3_au-h_top</i>     |                   |                  |                   |
| H                            | 8.07923254161892  | 4.95828425750443 | 13.80821096293195 |
| Pd                           | 9.29179506435600  | 7.24665442176949 | 12.19733835784162 |
| Pd                           | 10.66493209876828 | 4.86607710243854 | 12.19778355530539 |
| Pd                           | 7.95589785941671  | 4.89120288249528 | 12.25827288295151 |
| Au                           | 7.92423184521562  | 1.44724119950605 | 10.13324381815536 |
| Au                           | 4.95782910051148  | 6.58983579707655 | 10.13506374816702 |
| Au                           | 4.97192918081115  | 1.50968989590046 | 10.22475910003558 |
| Au                           | 6.39678533228082  | 3.98989906962324 | 10.17580840794494 |
| Au                           | 10.95428862486741 | 6.62368683826518 | 10.12038107092933 |
| Au                           | 9.35525638352264  | 3.91444157894679 | 10.05294773748369 |
| Au                           | 2.02491105904230  | 1.47053107016395 | 10.13426085592100 |
| Au                           | 7.80721005741086  | 6.59576282304405 | 10.05468996962431 |
| Au                           | 3.53769709510559  | 3.99918699047512 | 10.22877403097677 |
| Au                           | 6.43693971099646  | 0.60385774999545 | 7.72284572653237  |
| Au                           | 9.40257893680043  | 5.72585434399543 | 7.72257376077136  |
| Au                           | 3.48792416920551  | 5.71442768389895 | 7.72449197124789  |
| Au                           | 4.96469018559489  | 3.16070980444248 | 7.73305410780085  |
| Au                           | 7.91322541528830  | 3.16459468370203 | 7.70462027547023  |
| Au                           | 3.51310448867544  | 0.62360222388603 | 7.71513798069088  |
| Au                           | 0.55121678644858  | 0.61305332961710 | 7.71477163229011  |
| Au                           | 6.44322046264209  | 5.71172586889850 | 7.70466974842004  |
| Au                           | 2.04047984727841  | 3.17806566840644 | 7.71597989500445  |
| <i>1.22 cu_2fixed_layers</i> |                   |                  |                   |
| Cu                           | 9.49630347615275  | 4.24822043332364 | 4.64392422244793  |
| Cu                           | 4.34340774271353  | 4.24821083140515 | 4.64392422244793  |
| Cu                           | 8.20807605118625  | 2.01694320462929 | 4.64392422244793  |
| Cu                           | 5.63158977679275  | 2.01696066266288 | 4.64392422244793  |
| Cu                           | 6.91981807466096  | 4.24823789135718 | 4.64392422244793  |
| Cu                           | 3.05517944484532  | 2.01693360271085 | 4.64392422244793  |
| Cu                           | 10.78453351982433 | 6.47949766201794 | 4.64392422244793  |
| Cu                           | 8.20804549962747  | 6.47951424714985 | 4.64392422244793  |
| Cu                           | 5.63163604058175  | 6.47948806009946 | 4.64392422244793  |
| Cu                           | 6.91981283725085  | 1.27320478707094 | 2.54023117605788  |

|                             |                  |                   |                   |
|-----------------------------|------------------|-------------------|-------------------|
| Cu                          | 9.49626856008563 | 5.73575837155791  | 2.54023117605788  |
| Cu                          | 5.63163080317169 | 3.50445495581321  | 2.54023117605788  |
| Cu                          | 4.34337195374473 | 5.73574964254111  | 2.54023117605788  |
| Cu                          | 8.20804113511907 | 3.50448201576524  | 2.54023117605788  |
| Cu                          | 4.34340250530345 | 1.27317860002055  | 2.54023117605788  |
| Cu                          | 1.76691535800827 | 1.27319518515246  | 2.54023117605788  |
| Cu                          | 6.91985910103985 | 5.73573218450752  | 2.54023117605788  |
| Cu                          | 3.05514452877817 | 3.50447241384676  | 2.54023117605788  |
| <i>1.23 pt3_cu</i>          |                  |                   |                   |
| Pt                          | 4.34851866569533 | -0.14760653729969 | 10.78824622610841 |
| Pt                          | 9.55568570261095 | 4.22406528768064  | 10.78909427562627 |
| Pt                          | 6.87245141001855 | 4.22276164891639  | 10.79002691664485 |
| Cu                          | 6.90583933928697 | 1.28520576853599  | 8.92818519323081  |
| Cu                          | 4.34552634846998 | 5.71911115427403  | 8.92884064441137  |
| Cu                          | 4.34560227040404 | 1.32746499304153  | 8.78881662853581  |
| Cu                          | 5.58982140922789 | 3.48136091360396  | 8.79289906049773  |
| Cu                          | 9.56719767130257 | 5.77828361973573  | 8.78215756613219  |
| Cu                          | 8.21181134859693 | 3.42847246781541  | 8.78499721386643  |
| Cu                          | 1.78520897109880 | 1.28461709373527  | 8.92670766584788  |
| Cu                          | 6.85478262070671 | 5.77834512785260  | 8.78426071939604  |
| Cu                          | 3.10187358716582 | 3.48102039746850  | 8.79024278402502  |
| Cu                          | 5.64205346786353 | 0.53197768528848  | 6.73288221527628  |
| Cu                          | 8.20957110939696 | 4.99375055922216  | 6.72510155020074  |
| Cu                          | 3.06163830174113 | 5.00095792036322  | 6.73334778345788  |
| Cu                          | 4.34500400105290 | 2.76281148944872  | 6.70167919018622  |
| Cu                          | 6.92509132856998 | 2.75396043238425  | 6.73485816025123  |
| Cu                          | 3.04693798680680 | 0.53185501464339  | 6.73334051576908  |
| Cu                          | 0.47914826145520 | 0.53044981584761  | 6.82668464761276  |
| Cu                          | 5.62748192691739 | 5.00116330089382  | 6.73466288130306  |
| Cu                          | 1.76412449577178 | 2.75374224440750  | 6.73370696456937  |
| <i>1.24 pt3_cu-h_rim1</i>   |                  |                   |                   |
| H                           | 5.32035369760553 | 4.43351317402775  | 11.15482361327895 |
| Pt                          | 4.47021002510083 | -0.10599187134155 | 10.78970278433612 |
| Pt                          | 9.54714368212223 | 4.21483981638089  | 10.80291112501886 |
| Pt                          | 6.87372582267304 | 4.32254439564460  | 10.81994217772442 |
| Cu                          | 6.90387835618624 | 1.26931883688908  | 8.93225296903732  |
| Cu                          | 4.38053055697775 | 5.73286259766751  | 8.90572005967560  |
| Cu                          | 4.35072281161131 | 1.33679947793231  | 8.77537062040927  |
| Cu                          | 5.60406174712919 | 3.48258170445043  | 8.83109542024062  |
| Cu                          | 9.59871626175221 | 5.75778340395087  | 8.76722756724974  |
| Cu                          | 8.21457694227143 | 3.42419518396114  | 8.79147244290187  |
| Cu                          | 1.78420778335637 | 1.29325345907712  | 8.90239278853704  |
| Cu                          | 6.90216303714230 | 5.81266488519588  | 8.78884338121744  |
| Cu                          | 3.09457284085481 | 3.48217766991869  | 8.78753840396992  |
| Cu                          | 5.64459114944623 | 0.52560147440994  | 6.72842308038580  |
| Cu                          | 8.21505234745723 | 4.98982484167142  | 6.72705509575494  |
| Cu                          | 3.07799639292660 | 4.99733190779463  | 6.72895314700686  |
| Cu                          | 4.35589244338593 | 2.77130654129404  | 6.71094591084102  |
| Cu                          | 6.92728086898849 | 2.75229374920666  | 6.74724224673395  |
| Cu                          | 3.05185409618426 | 0.53173165359315  | 6.72657203437962  |
| Cu                          | 0.48000171178160 | 0.53005779804151  | 6.82065830494915  |
| Cu                          | 5.64376139084525 | 4.99871029925301  | 6.74839171861249  |
| Cu                          | 1.76765706850615 | 2.75464291690458  | 6.72598191060799  |
| <i>1.25 pt3_cu-h_bridge</i> |                  |                   |                   |
| H                           | 6.85150984248137 | 5.78199867559204  | 11.38357118919490 |
| Pt                          | 4.43036967287468 | -0.11893725333827 | 10.84628382208667 |
| Pt                          | 9.56250512034486 | 4.21659017754805  | 10.74303048988038 |
| Pt                          | 6.88528863683718 | 4.13393351412292  | 10.84724444647109 |
| Cu                          | 6.90182642259573 | 1.28401698850575  | 8.94856535439062  |
| Cu                          | 4.33924875889325 | 5.72309827531809  | 8.90932469326970  |
| Cu                          | 4.34718033172664 | 1.32386612118883  | 8.80337475373502  |
| Cu                          | 5.59208151025801 | 3.47768740906494  | 8.80588646913022  |
| Cu                          | 9.56154359837136 | 5.77459887814783  | 8.74970000242613  |
| Cu                          | 8.20903374512082 | 3.43060479735045  | 8.75218561859436  |
| Cu                          | 1.77541479936690 | 1.28443143034383  | 8.90754135667759  |
| Cu                          | 6.88277159195107 | 5.76019856958323  | 8.82439716079763  |
| Cu                          | 3.11432120655782 | 3.47155127888662  | 8.76934074047033  |
| Cu                          | 5.63918017128214 | 0.53323301783392  | 6.73399270235072  |
| Cu                          | 8.20717192983149 | 4.99250221266056  | 6.71561375895602  |

|                                 |                  |                   |                   |
|---------------------------------|------------------|-------------------|-------------------|
| Cu                              | 3.06594028439906 | 4.99501581275238  | 6.72189894005407  |
| Cu                              | 4.35075165321191 | 2.75700238271427  | 6.69902934094844  |
| Cu                              | 6.92066083031582 | 2.75118661785113  | 6.73525554771722  |
| Cu                              | 3.04972567483083 | 0.52438897179176  | 6.75256822053070  |
| Cu                              | 0.47453311199339 | 0.53060092976319  | 6.82849279408151  |
| Cu                              | 5.63367001465915 | 4.99917336046386  | 6.75346886091604  |
| Cu                              | 1.76962227145955 | 2.74962874102314  | 6.72259812403729  |
| <i>1.26 pt3_cu-h_three-fold</i> |                  |                   |                   |
| H                               | 8.21345542789067 | 5.00596802064071  | 11.73084182848475 |
| Pt                              | 4.34950090603994 | -0.09458412076182 | 10.78298948632031 |
| Pt                              | 9.59789433878458 | 4.20333833249494  | 10.78476991620401 |
| Pt                              | 6.83143506931768 | 4.20177224695384  | 10.78614848107707 |
| Cu                              | 6.90099556761708 | 1.28876892055611  | 8.93445021574153  |
| Cu                              | 4.34558677254353 | 5.71396474846983  | 8.93519808457534  |
| Cu                              | 4.34615557634591 | 1.34131018532115  | 8.75419519076981  |
| Cu                              | 5.57956586380501 | 3.47633536741685  | 8.76227992521317  |
| Cu                              | 9.56174658595447 | 5.77634537019736  | 8.78816063978563  |
| Cu                              | 8.21203325126539 | 3.43564077778832  | 8.79281706159405  |
| Cu                              | 1.79045716460183 | 1.28814529853697  | 8.93252271532843  |
| Cu                              | 6.86083599865456 | 5.77630453098788  | 8.79109300321137  |
| Cu                              | 3.11274022295971 | 3.47535034116260  | 8.75872760352417  |
| Cu                              | 5.64357890565574 | 0.53036679387528  | 6.73233904089569  |
| Cu                              | 8.20948243334604 | 4.99388282730478  | 6.72709118530833  |
| Cu                              | 3.06079187828946 | 5.00325661266391  | 6.73350405825188  |
| Cu                              | 4.34516834841986 | 2.76356127709920  | 6.67064782848180  |
| Cu                              | 6.92724246622142 | 2.75406959698064  | 6.73545420091424  |
| Cu                              | 3.04551589907633 | 0.53029045425836  | 6.73294265699864  |
| Cu                              | 0.47913246412654 | 0.53100519955810  | 6.83721439939882  |
| Cu                              | 5.62834701584044 | 5.00367849699555  | 6.73498811057086  |
| Cu                              | 1.76182697470388 | 2.75393231646059  | 6.73422249773176  |
| <i>1.27 pt3_cu-h_top</i>        |                  |                   |                   |
| H                               | 6.87271793859643 | 4.31582946889368  | 12.38294080510269 |
| Pt                              | 8.32773218032541 | 6.58855283717456  | 10.79073783332429 |
| Pt                              | 9.54509772644006 | 4.21802563633645  | 10.80456496405003 |
| Pt                              | 6.87271777192606 | 4.31582918177583  | 10.81545988384498 |
| Cu                              | 6.90330754659212 | 1.26805225605835  | 8.93160318001446  |
| Cu                              | 4.37840192194916 | 5.73310229275355  | 8.90337370443301  |
| Cu                              | 4.34943099126058 | 1.33561351335029  | 8.77520509801888  |
| Cu                              | 5.59982267509599 | 3.48153654330904  | 8.83120701362264  |
| Cu                              | 9.59275195604776 | 5.75696975783187  | 8.76672339771608  |
| Cu                              | 8.21434882564594 | 3.42602161404126  | 8.78880693956398  |
| Cu                              | 1.78487984962366 | 1.29460206666442  | 8.90395505639668  |
| Cu                              | 6.90121740469817 | 5.81155673108048  | 8.78835144696497  |
| Cu                              | 3.08918721415225 | 3.48185779898475  | 8.788737326370142 |
| Cu                              | 5.64378279355669 | 0.52668920814454  | 6.72833874248062  |
| Cu                              | 8.21368412612368 | 4.98918510636419  | 6.72261761424722  |
| Cu                              | 3.07776381214237 | 4.99594912926890  | 6.72778360574734  |
| Cu                              | 4.35416114750686 | 2.77109791918744  | 6.71193056125494  |
| Cu                              | 6.92465601861363 | 2.75092450186453  | 6.74733102138520  |
| Cu                              | 3.05209645699388 | 0.53250231732419  | 6.72672313227704  |
| Cu                              | 0.48020684367826 | 0.52910988167471  | 6.82214708010522  |
| Cu                              | 5.64228367914630 | 4.99770183698795  | 6.74870542408005  |
| Cu                              | 1.76614000191995 | 2.75412794045260  | 6.72501348853354  |
| <i>1.28 pd3_cu</i>              |                  |                   |                   |
| Pd                              | 8.21624657690941 | 6.58507956695830  | 10.82304649807667 |
| Pd                              | 9.59078227377986 | 4.20631918629339  | 10.82410398642530 |
| Pd                              | 6.84150557302312 | 4.20497255802834  | 10.82460600163159 |
| Cu                              | 6.91361335047862 | 1.28174747941337  | 8.89794121484011  |
| Cu                              | 4.34608621825145 | 5.72841652253090  | 8.89824176233558  |
| Cu                              | 4.34583564322121 | 1.31552710153428  | 8.77364501541873  |
| Cu                              | 5.60115817089274 | 3.48827235427580  | 8.77737463585670  |
| Cu                              | 9.54208903822594 | 5.76357154652103  | 8.81129238810060  |
| Cu                              | 8.21297523606350 | 3.45995827933180  | 8.81446113605109  |
| Cu                              | 1.77759825259138 | 1.28067143816650  | 8.89643093243961  |
| Cu                              | 6.88220079677954 | 5.76397667538950  | 8.81360968692202  |
| Cu                              | 3.09171649458869 | 3.48743567109975  | 8.77458704486182  |
| Cu                              | 5.64090089110338 | 0.52845637052268  | 6.73529940905471  |
| Cu                              | 8.20934542146408 | 4.99378428866660  | 6.73183472201447  |
| Cu                              | 3.05796592378600 | 5.00204358338510  | 6.73550632155262  |

|                                 |                  |                   |                   |
|---------------------------------|------------------|-------------------|-------------------|
| Cu                              | 4.34497853705363 | 2.76285285475816  | 6.69839692268459  |
| Cu                              | 6.92756433073796 | 2.75655640292718  | 6.73710067850737  |
| Cu                              | 3.04769381297086 | 0.52854166792347  | 6.73569140231645  |
| Cu                              | 0.47889399427356 | 0.53059778169446  | 6.80256554585777  |
| Cu                              | 5.63076449220698 | 5.00233338814252  | 6.73704351267621  |
| Cu                              | 1.76148081000756 | 2.75644426544294  | 6.73594864430192  |
| <i>1.29 pd3_cu-h_three-fold</i> |                  |                   |                   |
| H                               | 8.21416290685091 | 5.00423226495576  | 11.63444808697358 |
| Pd                              | 4.34959861902084 | -0.06984586723814 | 10.83863415938323 |
| Pd                              | 9.61912014486997 | 4.19255629449921  | 10.84044823596854 |
| Pd                              | 6.81068927979740 | 4.19112155005112  | 10.84107079398765 |
| Cu                              | 6.90758680162330 | 1.28563481431801  | 8.89426300736354  |
| Cu                              | 4.34603553158163 | 5.72126049333496  | 8.89496007513545  |
| Cu                              | 4.34572276123296 | 1.33006783894352  | 8.74443383807981  |
| Cu                              | 5.58890709947675 | 3.48169242328469  | 8.75050829843610  |
| Cu                              | 9.53794735693413 | 5.76297096104290  | 8.82257053502950  |
| Cu                              | 8.21238096233226 | 3.464456913221151 | 8.82618525994249  |
| Cu                              | 1.78372216353901 | 1.28435101673355  | 8.89281928397511  |
| Cu                              | 6.88612459588474 | 5.76269603299628  | 8.82432750121616  |
| Cu                              | 3.10275978245509 | 3.48109143119903  | 8.74829311294966  |
| Cu                              | 5.64303497890044 | 0.52561341488087  | 6.73705872928119  |
| Cu                              | 8.20949478130432 | 4.99398092823321  | 6.73768638603409  |
| Cu                              | 3.05631017186332 | 5.00534098237828  | 6.73811258239762  |
| Cu                              | 4.34483841308913 | 2.76339031828939  | 6.67189627609762  |
| Cu                              | 6.93107440152695 | 2.75680261668075  | 6.73959116329699  |
| Cu                              | 3.04586067145158 | 0.52566466243678  | 6.73736758637836  |
| Cu                              | 0.47906822296566 | 0.53083343986032  | 6.80086699755659  |
| Cu                              | 5.63255868014557 | 5.00557542706274  | 6.73928279830916  |
| Cu                              | 1.75793671801733 | 2.75679063435941  | 6.73868510428021  |
| <i>1.30 pd3_cu-h_bridge</i>     |                  |                   |                   |
| H                               | 6.99292274183219 | 5.69987070006043  | 11.48792207842390 |
| Pd                              | 4.41381004446904 | -0.07956747995915 | 10.87625417774134 |
| Pd                              | 9.58564849126387 | 4.20713392959320  | 10.79562042687947 |
| Pd                              | 6.84615465637624 | 4.12764861834433  | 10.87708269112146 |
| Cu                              | 6.90482071741666 | 1.28652307916526  | 8.90760704959827  |
| Cu                              | 4.33873832144743 | 5.72968827646989  | 8.88417002107997  |
| Cu                              | 4.34569838571088 | 1.32018055416198  | 8.77433712080495  |
| Cu                              | 5.59472276798945 | 3.48396304788696  | 8.77678925046310  |
| Cu                              | 9.54013455234370 | 5.76448065390585  | 8.79158159328328  |
| Cu                              | 8.21069955397316 | 3.45955289666015  | 8.79307483672783  |
| Cu                              | 1.77261575950796 | 1.28451814338522  | 8.88313456089474  |
| Cu                              | 6.89667869906450 | 5.75342745627161  | 8.85553807716833  |
| Cu                              | 3.09539104454016 | 3.48387748344688  | 8.75940609992976  |
| Cu                              | 5.64060838725679 | 0.52793559619702  | 6.73737386139233  |
| Cu                              | 8.20695492476695 | 4.99553603758136  | 6.73341372014404  |
| Cu                              | 3.06224136539802 | 5.00032835997386  | 6.72938868293758  |
| Cu                              | 4.34692045355699 | 2.76110531632964  | 6.69481743522130  |
| Cu                              | 6.92791789661078 | 2.75776071947209  | 6.73876298762251  |
| Cu                              | 3.04871999973578 | 0.52090878877967  | 6.75224526980991  |
| Cu                              | 0.47856038598656 | 0.53097757941925  | 6.79735462487409  |
| Cu                              | 5.63724527442091 | 5.00506817372376  | 6.75314409051843  |
| Cu                              | 1.76492204726190 | 2.75329184259063  | 6.72947872333198  |
| <i>1.31 pd3_cu-h_rim3</i>       |                  |                   |                   |
| H                               | 5.16153163510470 | 4.52203517525490  | 10.27888211803814 |
| Pd                              | 4.55085920657884 | 0.00509994577298  | 10.81170225387067 |
| Pd                              | 9.54912285291183 | 4.22349161740084  | 10.85423058592586 |
| Pd                              | 6.79064598148896 | 4.44867927748406  | 10.79767917849931 |
| Cu                              | 6.91579676168485 | 1.23688344651580  | 8.90109728066410  |
| Cu                              | 4.41810389622323 | 5.68394516074957  | 9.01048825999041  |
| Cu                              | 4.34893581768207 | 1.31666856695234  | 8.72090209703541  |
| Cu                              | 5.59721259145881 | 3.45298152543147  | 8.81079014002944  |
| Cu                              | 9.58714753883145 | 5.73282318943159  | 8.78984677520747  |
| Cu                              | 8.19094936667395 | 3.45776332579108  | 8.83950310058038  |
| Cu                              | 1.77141740358323 | 1.28861205140349  | 8.87567330469534  |
| Cu                              | 6.97474447455347 | 5.83471253046993  | 8.77067492351569  |
| Cu                              | 3.06236149811834 | 3.47308264425400  | 8.78785793679141  |
| Cu                              | 5.64941955910017 | 0.51346011594806  | 6.72205141507848  |
| Cu                              | 8.21978235268089 | 4.97693150054293  | 6.72393501248693  |
| Cu                              | 3.08726810897205 | 4.98905431574498  | 6.74207361529038  |

|                          |                   |                  |                   |
|--------------------------|-------------------|------------------|-------------------|
| Cu                       | 4.35019821250683  | 2.77066267157618 | 6.70030221741339  |
| Cu                       | 6.92527456839208  | 2.74053950464710 | 6.75906861726300  |
| Cu                       | 3.04579619735584  | 0.52988458326462 | 6.70993416034964  |
| Cu                       | 0.48137731447417  | 0.49697997742490 | 6.83258798057381  |
| Cu                       | 5.65119479435774  | 4.99557815652823 | 6.75344315104381  |
| Cu                       | 1.75830815037439  | 2.75072323118175 | 6.73810435472364  |
| <i>1.32 pd3_cu-h_top</i> |                   |                  |                   |
| H                        | 6.79061547271393  | 4.44858631906203 | 12.36024536144869 |
| Pd                       | 4.55085920657884  | 0.00509994577298 | 10.81170225387067 |
| Pd                       | 9.54912285291183  | 4.22349161740084 | 10.85423058592586 |
| Pd                       | 6.79064598148896  | 4.44867927748406 | 10.79767917849931 |
| Cu                       | 6.91579676168485  | 1.23688344651580 | 8.90109728066410  |
| Cu                       | 4.41810389622323  | 5.68394516074957 | 9.01048825999041  |
| Cu                       | 4.34893581768207  | 1.31666856695234 | 8.72090209703541  |
| Cu                       | 5.59721259145881  | 3.45298152543147 | 8.81079014002944  |
| Cu                       | 9.58714753883145  | 5.73282318943159 | 8.78984677520747  |
| Cu                       | 8.19094936667395  | 3.45776332579108 | 8.83950310058038  |
| Cu                       | 1.77141740358323  | 1.28861205140349 | 8.87567330469534  |
| Cu                       | 6.974744447455347 | 5.83471253046993 | 8.77067492351569  |
| Cu                       | 3.06236149811834  | 3.47308264425400 | 8.78785793679141  |
| Cu                       | 5.64941955910017  | 0.51346011594806 | 6.72205141507848  |
| Cu                       | 8.21978235268089  | 4.97693150054293 | 6.72393501248693  |
| Cu                       | 3.08726810897205  | 4.98905431574498 | 6.74207361529038  |
| Cu                       | 4.35019821250683  | 2.77066267157618 | 6.70030221741339  |
| Cu                       | 6.92527456839208  | 2.74053950464710 | 6.75906861726300  |
| Cu                       | 3.04579619735584  | 0.52988458326462 | 6.70993416034964  |
| Cu                       | 0.48137731447417  | 0.49697997742490 | 6.83258798057381  |
| Cu                       | 5.65119479435774  | 4.99557815652823 | 6.75344315104381  |
| Cu                       | 1.75830815037439  | 2.75072323118175 | 6.73810435472364  |

**2 Table 2**

*2.1 pt3\_au-h\_au-site1*

|    |                   |                  |                   |
|----|-------------------|------------------|-------------------|
| H  | 7.92686895192000  | 3.24666898230046 | 10.78923300000000 |
| Pt | 9.42878301012000  | 7.23284000298050 | 12.15411340000000 |
| Pt | 10.77293101500000 | 4.98765400191774 | 12.19264020000000 |
| Pt | 8.13839096952000  | 4.91159497892269 | 12.19709400000000 |
| Au | 7.99021299744000  | 1.48831502861446 | 10.10915880000000 |
| Au | 5.00985695628000  | 6.60484597371829 | 10.14106340000000 |
| Au | 4.99354495704000  | 1.52349496794095 | 10.27058760000000 |
| Au | 6.42709202364000  | 3.99253902394642 | 10.29096640000000 |
| Au | 11.05447299660000 | 6.67387196928312 | 10.03565680000000 |
| Au | 9.46914099768000  | 3.91247098894680 | 10.02104220000000 |
| Au | 2.06695798704000  | 1.48232099119088 | 10.16220400000000 |
| Au | 7.82284996260000  | 6.66105497260887 | 10.03434380000000 |
| Au | 3.60438101856000  | 4.00304803167336 | 10.29816840000000 |
| Au | 6.46452195192000  | 0.64815597278477 | 7.70909100000000  |
| Au | 9.42636496788000  | 5.75076796444051 | 7.71793360000000  |
| Au | 3.527066601312000 | 5.72108699495860 | 7.70566680000000  |
| Au | 5.01162098292000  | 3.18305299013688 | 7.79591020000000  |
| Au | 7.93936702620000  | 3.19986197247914 | 7.70979560000000  |
| Au | 3.53048403060000  | 0.64638500369620 | 7.69629120000000  |
| Au | 0.57711000744000  | 0.63007200927545 | 7.70795480000000  |
| Au | 6.46980499872000  | 5.72418900941255 | 7.71260360000000  |
| Au | 2.07227202984000  | 3.19059803478744 | 7.70701880000000  |

*2.2 pt3\_au-h\_au-site2*

|    |                   |                  |                   |
|----|-------------------|------------------|-------------------|
| H  | 6.49686700000000  | 7.43666400000000 | 10.92894306536176 |
| Pt | 9.49914982880591  | 7.22675051213433 | 12.20215068012793 |
| Pt | 10.81571250039946 | 4.96247481551679 | 12.17761726676784 |
| Pt | 8.19731675546845  | 4.95371769247413 | 12.19997812874828 |
| Au | 7.96853390461210  | 1.48529616821851 | 10.12958404497630 |
| Au | 5.01796118918607  | 6.55674544258161 | 10.23728955507145 |
| Au | 5.04340610177107  | 1.53551551802258 | 10.30932710079570 |
| Au | 6.46365714103171  | 3.99260462454378 | 10.31136026042359 |
| Au | 11.07490564007402 | 6.65623837691124 | 10.02810241667574 |
| Au | 9.47930210829906  | 3.87015149910359 | 10.03176303997028 |
| Au | 2.10053057844684  | 1.49184806946593 | 10.23488566360663 |
| Au | 7.95830575425758  | 6.60087586000885 | 9.98704089059116  |
| Au | 3.61791666417698  | 3.99592774652333 | 10.25005229733919 |
| Au | 6.47742989843292  | 0.63098399205256 | 7.70933760438158  |
| Au | 9.45545545011777  | 5.71983882786251 | 7.69749959903304  |
| Au | 3.566054564048672 | 5.71695902150337 | 7.71863178763280  |
| Au | 5.02238868626709  | 3.17060064505428 | 7.78339884619300  |
| Au | 7.95281098471531  | 3.18170315495473 | 7.71317903538523  |
| Au | 3.54972429366488  | 0.63217982985719 | 7.70229723137203  |
| Au | 0.58768204594698  | 0.61183927819014 | 7.72384938938139  |
| Au | 6.48178127040133  | 5.70904075166497 | 7.70579567894504  |
| Au | 2.08620951899005  | 3.14979019868354 | 7.71598095058498  |

*2.3 pt3\_au-h\_au-site3*

|    |                   |                  |                   |
|----|-------------------|------------------|-------------------|
| H  | 0.55672132295691  | 0.60149554902612 | 10.97084060070408 |
| Pt | 9.42291808760514  | 7.24611150290472 | 12.14735263374642 |
| Pt | 10.73600277632378 | 4.96588102316803 | 12.15244144893744 |
| Pt | 8.10383189302467  | 4.96956590117275 | 12.15281643348153 |
| Au | 7.89230435971462  | 1.47508663170285 | 10.26134901558929 |
| Au | 4.98091580891002  | 6.51540893073038 | 10.27259693810967 |
| Au | 4.98421833790439  | 1.52842752082143 | 10.25288075986404 |
| Au | 6.39979085501056  | 3.97760278065533 | 10.27419300746040 |
| Au | 10.99667890560705 | 6.62974239940977 | 9.99878961716767  |
| Au | 9.41292633315516  | 3.87914458147232 | 10.01449624851982 |
| Au | 2.07141958410491  | 1.47856523413276 | 10.24445645198875 |
| Au | 7.82428788096320  | 6.63822989705396 | 10.00714131336498 |
| Au | 3.56824926581162  | 3.97672300139078 | 10.25971984812452 |
| Au | 6.45222966586042  | 0.62300332819031 | 7.71220119738490  |
| Au | 9.40192558039485  | 5.71225952423444 | 7.68952436372292  |
| Au | 3.51968974866196  | 5.70439517354440 | 7.71283962470383  |
| Au | 4.97476359936468  | 3.15909700882933 | 7.75651587567063  |
| Au | 7.90975761586327  | 3.14649680307286 | 7.72238819170324  |
| Au | 3.49630416463573  | 0.62085215596433 | 7.71101325648890  |



|     |                          |                  |                   |
|-----|--------------------------|------------------|-------------------|
| Au  | 0.54453582966208         | 0.60041675311148 | 7.71687644027727  |
| Au  | 6.43213757586604         | 5.70626111318177 | 7.72058202188338  |
| Au  | 2.03611841597572         | 3.14565976721858 | 7.71286094354081  |
| 2.4 | <i>pd3_au-h_au-site1</i> |                  |                   |
| H   | 7.92686899999997         | 3.24666900000000 | 10.78923400000001 |
| Pd  | 9.35317457549721         | 7.22486022047299 | 12.19648628170313 |
| Pd  | 10.91368026375500        | 5.01457190827237 | 12.20091434320305 |
| Pd  | 8.18088265659113         | 4.68867008860276 | 12.03835893298442 |
| Au  | 8.00418623588063         | 1.48461293337653 | 10.15276084862842 |
| Au  | 4.97605658261054         | 6.62151218801680 | 10.12234777648723 |
| Au  | 4.98255428226970         | 1.48207411237213 | 10.20919556585831 |
| Au  | 6.30921277792624         | 4.02799676214803 | 10.15955518996783 |
| Au  | 10.99258348710422        | 6.69112175759021 | 10.07258410292335 |
| Au  | 9.64370526921601         | 3.96436130160279 | 9.95225532327883  |
| Au  | 2.09088224418599         | 1.42008290825747 | 10.13852141955960 |
| Au  | 7.84815643854554         | 6.57554086883204 | 10.06212990099865 |
| Au  | 3.57625525576434         | 3.99909288330639 | 10.16722479475237 |
| Au  | 6.48049829506454         | 0.64607211424727 | 7.71229660967885  |
| Au  | 9.42942087287597         | 5.75082158759839 | 7.69480855790139  |
| Au  | 3.51508500937465         | 5.73233517357802 | 7.70244895582992  |
| Au  | 5.00340823384819         | 3.15962614901205 | 7.71464329427045  |
| Au  | 7.95914222852022         | 3.19923947944174 | 7.69314545620982  |
| Au  | 3.53796603407658         | 0.60036290343406 | 7.70544210815827  |
| Au  | 0.56943916843713         | 0.62958465507752 | 7.70669186369312  |
| Au  | 6.46081894822334         | 5.71809068451731 | 7.70090741185899  |
| Au  | 2.09117729398051         | 3.15060356545694 | 7.65254690658910  |
| 2.5 | <i>pd3_au-h_au-site2</i> |                  |                   |
| H   | 6.49686700000000         | 7.43666400000001 | 10.93231979908114 |
| Pd  | 9.51072841979309         | 7.29815773540468 | 12.21799599220138 |
| Pd  | 10.87217816011163        | 4.93455479568488 | 12.19579220387593 |
| Pd  | 8.14270155069213         | 4.91285204456932 | 12.21912966402301 |
| Au  | 7.98622456006619         | 1.47635515066806 | 10.13349395776683 |
| Au  | 5.01103237520939         | 6.56680069653394 | 10.23744300494909 |
| Au  | 5.04595458331435         | 1.52135190027401 | 10.21643284054393 |
| Au  | 6.47869366985049         | 3.99770746549411 | 10.21882033828574 |
| Au  | 11.03934851382260        | 6.62937418861858 | 10.07258224797993 |
| Au  | 9.48530617570801         | 3.91972674492815 | 10.07953984800519 |
| Au  | 2.09067984640914         | 1.49355976821929 | 10.23423472596981 |
| Au  | 8.00207919858948         | 6.57467360194026 | 10.05638323141512 |
| Au  | 3.60750844896539         | 3.99975523164968 | 10.16831609947683 |
| Au  | 6.48843979063112         | 0.61852481366551 | 7.71588080865407  |
| Au  | 9.45461672164725         | 5.72049033246862 | 7.69477190531194  |
| Au  | 3.56627318091635         | 5.72791477240860 | 7.72156949373583  |
| Au  | 5.02823920853776         | 3.16587495311142 | 7.73649416157067  |
| Au  | 7.97105020740589         | 3.17904467480130 | 7.71904099523048  |
| Au  | 3.54916639461709         | 0.61653540298607 | 7.71916051499820  |
| Au  | 0.58961946989804         | 0.61156388407568 | 7.71703267214999  |
| Au  | 6.49441084441449         | 5.72082608667656 | 7.72268131926723  |
| Au  | 2.07924425971390         | 3.14486957700066 | 7.72357249314326  |
| 2.6 | <i>pd3_au-h_au-site3</i> |                  |                   |
| H   | 0.59286077281116         | 0.69158869318915 | 10.98669764606423 |
| Pd  | 9.46063968119629         | 7.35576812222867 | 12.18833149322339 |
| Pd  | 10.83044872372660        | 4.98523186464931 | 12.17951467182903 |
| Pd  | 8.10346930822672         | 4.97761556533087 | 12.18537286740325 |
| Au  | 7.92616195429400         | 1.55492170414047 | 10.26761893650210 |
| Au  | 5.02145143718135         | 6.60955521240444 | 10.23084397026422 |
| Au  | 5.02152920373490         | 1.57624913297397 | 10.18823556217425 |
| Au  | 6.45079949395092         | 4.06105758941363 | 10.18781688719397 |
| Au  | 10.99732103280793        | 6.67517309534211 | 10.05838626118476 |
| Au  | 9.45866241362828         | 3.99640961472289 | 10.04814328366718 |
| Au  | 2.11178347728237         | 1.54644240088182 | 10.25673950833843 |
| Au  | 7.90497255843403         | 6.67368347210762 | 10.06617454683833 |
| Au  | 3.60215574108331         | 4.05041323306850 | 10.17945960278012 |
| Au  | 6.48691015915043         | 0.66599611321646 | 7.72372251866134  |
| Au  | 9.43088652112808         | 5.76807184550847 | 7.68889416884011  |
| Au  | 3.53806451872853         | 5.77057908922210 | 7.72090218911876  |
| Au  | 5.00704059125488         | 3.21372755533167 | 7.71900045694833  |
| Au  | 7.95237852018860         | 3.19793930171719 | 7.72765363183381  |
| Au  | 3.51911347068403         | 0.66619738342847 | 7.72717470954659  |

|     |                          |                   |                   |
|-----|--------------------------|-------------------|-------------------|
| Au  | 0.57079779890839         | 0.65603650872077  | 7.71504930344228  |
| Au  | 6.47121661774106         | 5.77502148793086  | 7.72672420131725  |
| Au  | 2.05727084809640         | 3.19404166673468  | 7.71827395715006  |
| 2.7 | <i>pt3_cu-h_cu-site1</i> |                   |                   |
| H   | 6.90960300000000         | 2.78169300000000  | 9.76853799999999  |
| Pt  | 8.17177222331282         | 6.48461448757234  | 10.81500200000000 |
| Pt  | 9.69472961569581         | 4.30278464651287  | 10.77917860000007 |
| Pt  | 7.00000015287091         | 4.06416129422375  | 10.77530999999997 |
| Cu  | 6.92496999999999         | 1.27518699999999  | 8.85785299999995  |
| Cu  | 4.34610199999999         | 5.74025200000002  | 8.85887499999994  |
| Cu  | 4.34833900000001         | 1.34293300000000  | 8.99550599999992  |
| Cu  | 5.58699699999999         | 3.47807800000001  | 8.99636899999999  |
| Cu  | 9.61346900000001         | 5.80684999999999  | 8.76174100000001  |
| Cu  | 8.21507299999998         | 3.37893899999999  | 8.76425599999996  |
| Cu  | 1.76537300000000         | 1.27386600000001  | 8.85670099999998  |
| Cu  | 6.81304000000002         | 5.80670999999999  | 8.76131899999999  |
| Cu  | 3.11623799999998         | 3.48066599999999  | 8.99536700000001  |
| Cu  | 5.61696200000001         | 0.54041500000000  | 6.73146400000002  |
| Cu  | 8.20621299999996         | 4.99227399999998  | 6.74018699999998  |
| Cu  | 3.05609199999999         | 4.97635900000001  | 6.73198499999994  |
| Cu  | 4.34473600000001         | 2.76426800000000  | 6.79621199999998  |
| Cu  | 6.90524100000001         | 2.76524599999999  | 6.73367800000000  |
| Cu  | 3.06848300000000         | 0.54406500000001  | 6.73159899999997  |
| Cu  | 0.47665899999997         | 0.52823399999998  | 6.73563899999997  |
| Cu  | 5.62819200000000         | 4.97640300000000  | 6.73268799999993  |
| Cu  | 1.78240300000001         | 2.76740599999999  | 6.73243700000006  |
| 2.8 | <i>pt3_cu-h_cu-site2</i> |                   |                   |
| H   | 8.21101654416018         | 1.83269773980439  | 9.80457646814774  |
| Pt  | 4.34856002151426         | -0.05472207737063 | 10.75113009650318 |
| Pt  | 9.56347264701704         | 4.34253958248187  | 10.82442094343378 |
| Pt  | 6.86504909057721         | 4.34219229758475  | 10.82583288492082 |
| Cu  | 6.88971816353630         | 1.23627383391578  | 8.95024146196566  |
| Cu  | 4.34546126199309         | 5.67722355024766  | 8.95196211668940  |
| Cu  | 4.34579769341742         | 1.34335280380775  | 8.73166807793791  |
| Cu  | 5.59952760029207         | 3.48265954242709  | 8.83067481608353  |
| Cu  | 9.54242966878417         | 5.76862400088791  | 8.75151966363098  |
| Cu  | 8.21123577243579         | 3.39394300124100  | 8.85755411380343  |
| Cu  | 1.80053797722475         | 1.23577332762969  | 8.94855548698675  |
| Cu  | 6.88026760034643         | 5.76883804560965  | 8.75333058592586  |
| Cu  | 3.09177775407291         | 3.48177014033621  | 8.82782937320223  |
| Cu  | 5.650757432126281        | 0.53072039809043  | 6.72212974502680  |
| Cu  | 8.20966883582570         | 4.96522487936227  | 6.72581970940699  |
| Cu  | 3.06246542253478         | 4.99382439912306  | 6.74197104159856  |
| Cu  | 4.34454644291093         | 2.77103992347773  | 6.70154274904317  |
| Cu  | 6.91998000973696         | 2.75165632857350  | 6.74403930310101  |
| Cu  | 3.03822839190495         | 0.53086598722951  | 6.72268894855601  |
| Cu  | 0.47910754505635         | 0.50959278983397  | 6.80645248066123  |
| Cu  | 5.62657730269912         | 4.99423151876869  | 6.74346075187885  |
| Cu  | 1.76859214973560         | 2.75148710472180  | 6.74316064865515  |
| 2.9 | <i>pt3_cu-h_cu-site3</i> |                   |                   |
| H   | 0.48069307981122         | 0.54118507173628  | 9.83722902232320  |
| Pt  | 8.21335967363192         | 6.58462125884163  | 10.76759853454937 |
| Pt  | 9.55754710960479         | 4.26656827864124  | 10.78039892456553 |
| Pt  | 6.86790231526599         | 4.26685360293594  | 10.78145455345381 |
| Cu  | 6.90378518688569         | 1.29009844954688  | 8.99698322820863  |
| Cu  | 4.34532431153373         | 5.70506992190968  | 9.04204962335866  |
| Cu  | 4.34529580181078         | 1.33892838120271  | 8.75707886758863  |
| Cu  | 5.58924274994099         | 3.48168718673833  | 8.79263783578353  |
| Cu  | 9.54385086117089         | 5.77572575546639  | 8.75551553666229  |
| Cu  | 8.21089295656826         | 3.46241873458005  | 8.78223632687441  |
| Cu  | 1.78597663347892         | 1.28968401250014  | 8.99436319455011  |
| Cu  | 6.87767578221662         | 5.77616877457722  | 8.75744695033693  |
| Cu  | 3.10129168879215         | 3.48146678187285  | 8.78988422988805  |
| Cu  | 5.65012170119059         | 0.53560844527445  | 6.72970165519300  |
| Cu  | 8.20894204505306         | 4.99047575714142  | 6.70365967007181  |
| Cu  | 3.07052938761916         | 5.00160121662614  | 6.74174910576748  |
| Cu  | 4.34430338664239         | 2.76633891818546  | 6.69296037672905  |
| Cu  | 6.92637954663512         | 2.74156338450251  | 6.74733863538335  |
| Cu  | 3.03761505630122         | 0.53566159098304  | 6.73017380501446  |

|                               |                  |                  |                   |
|-------------------------------|------------------|------------------|-------------------|
| Cu                            | 0.47831375585260 | 0.52334269021737 | 6.80456049566656  |
| Cu                            | 5.61734835760512 | 5.00188848311423 | 6.74340780148426  |
| Cu                            | 1.76166355444911 | 2.74150138105390 | 6.74614084111999  |
| <i>2.10 pd3_cu-h_cu-site1</i> |                  |                  |                   |
| H                             | 6.90960300000000 | 2.78169300000000 | 9.52658356345994  |
| Pd                            | 8.21620496840482 | 6.58550497087918 | 10.82319223597793 |
| Pd                            | 9.59047728809736 | 4.20687720452577 | 10.82426992205589 |
| Pd                            | 6.84174297621973 | 4.20553586833233 | 10.82465432719258 |
| Cu                            | 6.91361098220897 | 1.28173141234640 | 8.89734377913174  |
| Cu                            | 4.34607824580669 | 5.72836957849940 | 8.89768691171086  |
| Cu                            | 4.34587566048038 | 1.31556759440731 | 8.77341163455913  |
| Cu                            | 5.60112425376055 | 3.48822619764721 | 8.77722840574186  |
| Cu                            | 9.54253548096757 | 5.76397209521768 | 8.81134450548304  |
| Cu                            | 8.21299443137915 | 3.45927415741260 | 8.81438693958250  |
| Cu                            | 1.77762453293883 | 1.28063658047884 | 8.89590213150742  |
| Cu                            | 6.88171635780982 | 5.76442723593863 | 8.81344526339235  |
| Cu                            | 3.09173318653008 | 3.48740627250601 | 8.77446049103726  |
| Cu                            | 5.64052818489001 | 0.52880317100014 | 6.73552373170201  |
| Cu                            | 8.20936217421047 | 4.99372183300449 | 6.73250272520257  |
| Cu                            | 3.05810920268361 | 5.00149067746129 | 6.73575512979583  |
| Cu                            | 4.34500250400048 | 2.76285266775907 | 6.69826163547518  |
| Cu                            | 6.9270333293750  | 2.75669338102469 | 6.73738747028649  |
| Cu                            | 3.04810793398826 | 0.52887591697075 | 6.73590322795272  |
| Cu                            | 0.47892488848570 | 0.53057389757936 | 6.80200188004687  |
| Cu                            | 5.63062377475880 | 5.00175926926601 | 6.73730095868185  |
| Cu                            | 1.76203135213493 | 2.75656290534914 | 6.73619493238634  |
| <i>2.11 pd3_cu-h_cu-site2</i> |                  |                  |                   |
| H                             | 8.23244400057598 | 1.89362164802006 | 9.80514226825324  |
| Pd                            | 8.21858955236393 | 6.67521408636087 | 10.79994285547094 |
| Pd                            | 9.67206465859962 | 4.35792772146675 | 10.84419656776898 |
| Pd                            | 6.87805542428080 | 4.30192622753477 | 10.85587409822542 |
| Cu                            | 6.92134956747021 | 1.25006164628969 | 8.93019116975923  |
| Cu                            | 4.35182784020928 | 5.68425636918289 | 8.92162713620026  |
| Cu                            | 4.36384620616512 | 1.32512073486137 | 8.72431791246084  |
| Cu                            | 5.62640576908606 | 3.49124037821657 | 8.80709800262907  |
| Cu                            | 9.52992307660920 | 5.77368131028497 | 8.77682753197370  |
| Cu                            | 8.24915905757239 | 3.44102305193757 | 8.88193064813510  |
| Cu                            | 1.80707660706835 | 1.23634063666281 | 8.92560810264859  |
| Cu                            | 6.91372842207486 | 5.75571136015462 | 8.78937627005855  |
| Cu                            | 3.10596683670337 | 3.48529602810103 | 8.79104616155634  |
| Cu                            | 5.66321259464061 | 0.53236479267199 | 6.72497630415325  |
| Cu                            | 8.22046062886552 | 4.96717958603338 | 6.73250231251423  |
| Cu                            | 3.06861034043650 | 4.99713290096192 | 6.74324577774570  |
| Cu                            | 4.35828122462551 | 2.76681212988269 | 6.70135815503454  |
| Cu                            | 6.93790941853585 | 2.75368856951404 | 6.74850405065021  |
| Cu                            | 3.04825230505426 | 0.52671090087532 | 6.72995274121319  |
| Cu                            | 0.48976959674699 | 0.51071703941074 | 6.79006030233571  |
| Cu                            | 5.63930825535244 | 4.99610341275227 | 6.74852840146242  |
| Cu                            | 1.77698069416096 | 2.74990865025811 | 6.74276736491625  |
| <i>2.12 pd3_cu-h_cu-site3</i> |                  |                  |                   |
| H                             | 0.47735314322842 | 0.51398800428854 | 9.81811060214128  |
| Pd                            | 8.23434700517275 | 6.56192449065751 | 10.81900320917354 |
| Pd                            | 9.60937302330638 | 4.18141091192959 | 10.81250838820416 |
| Pd                            | 6.86075699683913 | 4.17566690066272 | 10.82169060020055 |
| Cu                            | 6.90340025752492 | 1.26515597031148 | 8.96539430064742  |
| Cu                            | 4.34156823621472 | 5.70468393455634 | 8.95982277028470  |
| Cu                            | 4.34359963585550 | 1.30083075477606 | 8.76772231364740  |
| Cu                            | 5.59747546819557 | 3.46967624761500 | 8.77513158117014  |
| Cu                            | 9.51838543973057 | 5.72908444508830 | 8.79320813300645  |
| Cu                            | 8.21556405942012 | 3.46362244499943 | 8.79905922486421  |
| Cu                            | 1.77907658177511 | 1.26307886937591 | 8.95704504063088  |
| Cu                            | 6.90139554634135 | 5.73339053432090 | 8.80817263217291  |
| Cu                            | 3.09655833521523 | 3.46562803527625 | 8.75699562808531  |
| Cu                            | 5.64931657333889 | 0.52091407970688 | 6.74401689497281  |
| Cu                            | 8.20651808804394 | 4.98247774477416 | 6.71265745177742  |
| Cu                            | 3.06573465942264 | 4.99737242070863 | 6.74042168622085  |
| Cu                            | 4.34629250887348 | 2.75037931969527 | 6.69423372220198  |
| Cu                            | 6.92687962539553 | 2.73565763996110 | 6.74716477827945  |
| Cu                            | 3.03564520790736 | 0.52027042657999 | 6.74610009016123  |

|                      |                   |                  |                   |
|----------------------|-------------------|------------------|-------------------|
| Cu                   | 0.47612044673253  | 0.52141204308473 | 6.77464076536955  |
| Cu                   | 5.62039425413747  | 4.99824585337146 | 6.74831852146643  |
| Cu                   | 1.75921777035577  | 2.73498004691461 | 6.74098094459707  |
| <i>2.13 au-h_fcc</i> |                   |                  |                   |
| H                    | 7.93753863696696  | 4.88009762408353 | 10.89072059172093 |
| Au                   | 7.92897103127159  | 1.45840465181443 | 10.10370255012754 |
| Au                   | 4.97232715870823  | 6.58518692867875 | 10.10232938808277 |
| Au                   | 4.96999002290453  | 1.47386473688451 | 10.11449128364231 |
| Au                   | 6.40474760038492  | 3.99490319725091 | 10.20363418573862 |
| Au                   | 10.89239555595460 | 6.58803856511759 | 10.10215084491611 |
| Au                   | 9.46710065167765  | 3.99356680220757 | 10.20661943920129 |
| Au                   | 2.03354987431397  | 1.47110906163458 | 10.11469524564773 |
| Au                   | 7.93597399665616  | 6.64499428163085 | 10.20630157754976 |
| Au                   | 3.50270269908308  | 4.01416006230039 | 10.11960442093481 |
| Au                   | 6.44994266409768  | 0.60983070367858 | 7.69980096644152  |
| Au                   | 9.39743904041957  | 5.71765189134199 | 7.70989908090743  |
| Au                   | 3.49978346376602  | 5.71959675481183 | 7.70047902216173  |
| Au                   | 4.99388218384497  | 3.17982081331254 | 7.71320918181510  |
| Au                   | 7.92893659769024  | 3.17419395007630 | 7.71018438548987  |
| Au                   | 3.50084566643625  | 0.59223505194375 | 7.71142193675808  |
| Au                   | 0.54932693467755  | 0.60893850785257 | 7.70018028109850  |
| Au                   | 6.46033142150524  | 5.71928665042616 | 7.70972807079345  |
| Au                   | 2.00950924676762  | 3.17358343329890 | 7.71239659170654  |
| <i>2.14 cu-h_fcc</i> |                   |                  |                   |
| H                    | 6.92830989575482  | 4.25131402538901 | 9.76144759579013  |
| Cu                   | 6.92678272082930  | 1.26253572344457 | 8.79063260308194  |
| Cu                   | 4.33789941243480  | 5.74685298134243 | 8.79074819922853  |
| Cu                   | 4.34902431598716  | 1.27674371851755 | 8.79760593391730  |
| Cu                   | 5.63797566473496  | 3.50773391503827 | 8.85133763745348  |
| Cu                   | 9.51578698221859  | 5.74671850183961 | 8.79088606986977  |
| Cu                   | 8.21633425792583  | 3.50744601396554 | 8.85104328409208  |
| Cu                   | 1.77419876354932  | 1.27679390612997 | 8.79745086639407  |
| Cu                   | 6.92696812957522  | 5.74018763993565 | 8.85163890372813  |
| Cu                   | 3.06161738374017  | 3.50718452853449 | 8.79748197998883  |
| Cu                   | 5.63163350468310  | 0.53371260730700 | 6.73210780608161  |
| Cu                   | 8.21339950913428  | 4.99506945016081 | 6.72654925326476  |
| Cu                   | 3.05867668946604  | 4.99014526567201 | 6.73209042744251  |
| Cu                   | 4.36395565562224  | 2.77269270394003 | 6.74673623577668  |
| Cu                   | 6.92393674887390  | 2.76176785221795 | 6.72637610081816  |
| Cu                   | 3.05898923111204  | 0.51195125313286 | 6.74661778504117  |
| Cu                   | 0.48593938493244  | 0.53375533996270 | 6.73192729752789  |
| Cu                   | 5.63446474005356  | 4.99522375495322 | 6.72661651326358  |
| Cu                   | 1.75403208618727  | 2.77251711106709 | 6.74645735215333  |

### 3 Table 3

|                                         |                   |                  |                   |
|-----------------------------------------|-------------------|------------------|-------------------|
| <i>3.1 pt3_au-h_rim1_to_au-site4_TS</i> |                   |                  |                   |
| H                                       | 5.34437546832962  | 5.16711909141020 | 11.16320288129863 |
| Pt                                      | 9.41360324213599  | 7.27168887699785 | 12.19545265390974 |
| Pt                                      | 10.70496621501722 | 5.00149087814842 | 12.16769008066538 |
| Pt                                      | 8.04945121914353  | 5.01887431749887 | 12.19397529868577 |
| Au                                      | 7.95461381109620  | 1.49273877974418 | 10.13723590303407 |
| Au                                      | 5.00687318517393  | 6.62482637729562 | 10.11009027916745 |
| Au                                      | 5.00305911461245  | 1.56111655013834 | 10.30509683628755 |
| Au                                      | 6.40243999855377  | 4.01409421582023 | 10.27845043264040 |
| Au                                      | 11.03425516037916 | 6.68530332334069 | 10.04056395076515 |
| Au                                      | 9.42454812822440  | 3.89402091946800 | 10.03348477459083 |
| Au                                      | 2.05178304435495  | 1.49586329843314 | 10.16065314194418 |
| Au                                      | 7.84077486996199  | 6.68648865177015 | 10.01938155059429 |
| Au                                      | 3.55103707731208  | 4.01088359951872 | 10.28500941867512 |
| Au                                      | 6.45757368838779  | 0.63721067068211 | 7.70752154801595  |
| Au                                      | 9.42613941725760  | 5.73865420608714 | 7.71829592510593  |
| Au                                      | 3.53000743782526  | 5.72040564376673 | 7.71182354579158  |
| Au                                      | 4.99422836870605  | 3.18859895305718 | 7.79706893499708  |
| Au                                      | 7.93255471269556  | 3.18822125986929 | 7.71147693888639  |
| Au                                      | 3.53168157299012  | 0.64549611686846 | 7.70677492240065  |
| Au                                      | 0.57326903916229  | 0.63559576650368 | 7.70829280931991  |
| Au                                      | 6.47339109549448  | 5.71749798778346 | 7.70786638627180  |
| Au                                      | 2.06269031523368  | 3.18712355074374 | 7.69734651323988  |
| <i>3.2 pd3_au-h_rim2_to_au-site4_TS</i> |                   |                  |                   |
| H                                       | 5.36969115905337  | 5.22432128631367 | 11.14510526802066 |
| Pd                                      | 9.50448156866995  | 7.44277709023990 | 12.21846463340161 |
| Pd                                      | 10.87697235862197 | 5.08989500885427 | 12.22026337893013 |
| Pd                                      | 8.14130534163021  | 5.05483984601934 | 12.18382338220047 |
| Au                                      | 7.97389009818123  | 1.54816717216480 | 10.12830001425665 |
| Au                                      | 5.00749161216614  | 6.68882073248146 | 10.12141079349487 |
| Au                                      | 4.99327245584172  | 1.57818051136662 | 10.16281286756222 |
| Au                                      | 6.38589766226578  | 4.06325450153732 | 10.24814138562675 |
| Au                                      | 11.00809056388680 | 6.72413766682925 | 10.06939879638968 |
| Au                                      | 9.47292739714596  | 3.99338227595735 | 10.10393726564132 |
| Au                                      | 2.04505447208234  | 1.53487750515158 | 10.13633432368660 |
| Au                                      | 7.89190380364103  | 6.73251008049454 | 10.09456205671127 |
| Au                                      | 3.53821154792713  | 4.07836674353061 | 10.16746951098018 |
| Au                                      | 6.46986294104307  | 0.67480096941906 | 7.70231755728946  |
| Au                                      | 9.42341186011058  | 5.77493042607887 | 7.72814249245806  |
| Au                                      | 3.52379835438439  | 5.77332015714437 | 7.70515978361925  |
| Au                                      | 5.01378213550321  | 3.23619208362911 | 7.75280569137442  |
| Au                                      | 7.94353964660316  | 3.24041003521706 | 7.73671299876601  |
| Au                                      | 3.52625175398313  | 0.66301274040804 | 7.70030629241879  |
| Au                                      | 0.571733668884815 | 0.66772602908977 | 7.70062295879909  |
| Au                                      | 6.48350075467458  | 5.76868868348761 | 7.73057411653400  |
| Au                                      | 2.04590437122134  | 3.22290488900351 | 7.70109360226697  |
| <i>3.3 pt3_cu-h_rim1_to_cu-site4_TS</i> |                   |                  |                   |
| H                                       | 4.16394985760105  | 4.26354891380850 | 9.92182373267360  |
| Pt                                      | 8.33541865970082  | 6.58874586575845 | 10.78970278433620 |
| Pt                                      | 9.54714368212223  | 4.21483981638087 | 10.80291112501886 |
| Pt                                      | 6.87372582267307  | 4.32254439564461 | 10.81994217772437 |
| Cu                                      | 6.90387835618626  | 1.26931883688910 | 8.93225296903735  |
| Cu                                      | 4.38053055697777  | 5.73286259766750 | 8.90572005967560  |
| Cu                                      | 4.35072281161130  | 1.33679947793231 | 8.77537062040927  |
| Cu                                      | 5.60406174712917  | 3.48258170445042 | 8.83109542024058  |
| Cu                                      | 9.59871626175219  | 5.75778340395085 | 8.76722756724980  |
| Cu                                      | 8.21457694227142  | 3.42419518396112 | 8.79147244290185  |
| Cu                                      | 1.78420778335637  | 1.29325345907710 | 8.90239278853704  |
| Cu                                      | 6.90216303714231  | 5.81266488519589 | 8.78884338121743  |
| Cu                                      | 3.09457284085480  | 3.48217766991867 | 8.78753840396994  |
| Cu                                      | 5.64459114944624  | 0.52560147440996 | 6.72842308038581  |
| Cu                                      | 8.21505234745721  | 4.98982484167140 | 6.72705509575499  |
| Cu                                      | 3.07799639292661  | 4.99733190779465 | 6.72895314700686  |
| Cu                                      | 4.35589244338591  | 2.77130654129402 | 6.71094591084101  |
| Cu                                      | 6.92728086898851  | 2.75229374920667 | 6.74724224673392  |

|     |                                     |                  |                   |
|-----|-------------------------------------|------------------|-------------------|
| Cu  | 3.05185409618429                    | 0.53173165359316 | 6.72657203437956  |
| Cu  | 0.48000171178160                    | 0.53005779804153 | 6.82065830494908  |
| Cu  | 5.64376139084525                    | 4.99871029925302 | 6.74839171861243  |
| Cu  | 1.76765706850612                    | 2.75464291690456 | 6.72598191060796  |
| 3.4 | <i>pd3_cu-h_rim3_to_cu-site4_TS</i> |                  |                   |
| H   | 4.02856359526003                    | 4.27405085461717 | 9.97535289409820  |
| Pd  | 4.55085915385425                    | 0.00509991731335 | 10.81170220050642 |
| Pd  | 9.54912281667029                    | 4.22349158904401 | 10.85423051150644 |
| Pd  | 6.79064594126996                    | 4.44867926883274 | 10.79767913978149 |
| Cu  | 6.91579679726005                    | 1.23688345882808 | 8.90109717030737  |
| Cu  | 4.41810388639651                    | 5.68394514512876 | 9.01048830090188  |
| Cu  | 4.34893582327201                    | 1.31666859833634 | 8.72090215632767  |
| Cu  | 5.59721260492914                    | 3.45298150287950 | 8.81079018437259  |
| Cu  | 9.58714750235074                    | 5.73282315755783 | 8.78984682896873  |
| Cu  | 8.19094937950784                    | 3.45776335320295 | 8.83950309795704  |
| Cu  | 1.77141742547200                    | 1.28861202363820 | 8.87567328041735  |
| Cu  | 6.97474443706089                    | 5.83471251349483 | 8.77067485294204  |
| Cu  | 3.06236151085685                    | 3.47308265377725 | 8.78785802724126  |
| Cu  | 5.64941955278374                    | 0.51346014106363 | 6.72205134038659  |
| Cu  | 8.21978236714264                    | 4.97693149987387 | 6.72393506220995  |
| Cu  | 3.08726814225648                    | 4.98905433096821 | 6.74207371468705  |
| Cu  | 4.35019820041204                    | 2.77066266976805 | 6.70030229673295  |
| Cu  | 6.92527459804880                    | 2.74053949647786 | 6.75906851680400  |
| Cu  | 3.04579623160323                    | 0.52988460894358 | 6.70993424301971  |
| Cu  | 0.48137733508262                    | 0.49697997296575 | 6.83258791002243  |
| Cu  | 5.65119480445754                    | 4.99557815205091 | 6.75344322413988  |
| Cu  | 1.75830814521479                    | 2.75072326373404 | 6.73810428159202  |

#### 4 Table S2

|     |                                         |                  |                   |
|-----|-----------------------------------------|------------------|-------------------|
| 4.1 | <i>pt3_au-h_bridge_to_rim1_TS</i>       |                  |                   |
| H   | 7.52755765741458                        | 6.05360638018980 | 13.28190149297016 |
| Pt  | 9.33116447023131                        | 7.32375549678283 | 12.23780353838006 |
| Pt  | 10.67087665698952                       | 5.02847836854907 | 12.07971362588668 |
| Pt  | 8.01985785010922                        | 4.96757845902434 | 12.24183140018864 |
| Au  | 7.94394477861775                        | 1.47324388832260 | 10.15521791175982 |
| Au  | 4.96053955181114                        | 6.58062590285138 | 10.14534089048024 |
| Au  | 4.98899717368342                        | 1.55303796274548 | 10.29006520685007 |
| Au  | 6.39988246351923                        | 3.99447811595426 | 10.28102928976831 |
| Au  | 10.97266864794397                       | 6.72201889964086 | 10.02250914448045 |
| Au  | 9.36989763925677                        | 3.87344968547201 | 10.02652832406220 |
| Au  | 2.02913113518679                        | 1.46980127281678 | 10.14473069752850 |
| Au  | 7.81619827576423                        | 6.63899698784994 | 10.04264505117402 |
| Au  | 3.55577468723637                        | 4.00173823231181 | 10.30405777496604 |
| Au  | 6.44745490303165                        | 0.63672927914943 | 7.69804157347373  |
| Au  | 9.41117519783774                        | 5.72064145500378 | 7.71656434956205  |
| Au  | 3.50242355277403                        | 5.70253210435049 | 7.71347527707013  |
| Au  | 4.97499128688546                        | 3.17718905788000 | 7.78651814190337  |
| Au  | 7.91367004551105                        | 3.16919268744895 | 7.70296429229461  |
| Au  | 3.52676735669867                        | 0.62361126701882 | 7.72115686587453  |
| Au  | 0.55449295572481                        | 0.60635325944310 | 7.72298815935751  |
| Au  | 6.45352580306365                        | 5.70582504462040 | 7.71842015627621  |
| Au  | 2.05387281147417                        | 3.16884180901933 | 7.70813898487634  |
| 4.2 | <i>pt3_au-h_bridge_to_three-fold_TS</i> |                  |                   |
| H   | 9.19448822296712                        | 5.86500664220298 | 13.26675889116281 |
| Pt  | 9.33116447023130                        | 7.32375549678281 | 12.23780353838006 |
| Pt  | 10.67087665698952                       | 5.02847836854906 | 12.07971362588668 |
| Pt  | 8.01985785010922                        | 4.96757845902434 | 12.24183140018864 |
| Au  | 7.94394477861774                        | 1.47324388832260 | 10.15521791175982 |
| Au  | 4.96053955181114                        | 6.58062590285137 | 10.14534089048024 |
| Au  | 4.98899717368342                        | 1.55303796274548 | 10.29006520685007 |
| Au  | 6.39988246351923                        | 3.99447811595426 | 10.28102928976831 |
| Au  | 10.97266864794396                       | 6.72201889964086 | 10.02250914448045 |
| Au  | 9.36989763925676                        | 3.87344968547200 | 10.02652832406220 |
| Au  | 2.02913113518679                        | 1.46980127281678 | 10.14473069752850 |
| Au  | 7.81619827576423                        | 6.63899698784994 | 10.04264505117402 |
| Au  | 3.55577468723637                        | 4.00173823231181 | 10.30405777496604 |
| Au  | 6.44745490303165                        | 0.63672927914943 | 7.69804157347373  |
| Au  | 9.41117519783774                        | 5.72064145500377 | 7.71656434956205  |
| Au  | 3.50242355277403                        | 5.70253210435048 | 7.71347527707013  |
| Au  | 4.97499128688546                        | 3.17718905788000 | 7.78651814190337  |
| Au  | 7.91367004551105                        | 3.16919268744895 | 7.70296429229461  |
| Au  | 3.52676735669867                        | 0.62361126701882 | 7.72115686587453  |
| Au  | 0.55449295572481                        | 0.60635325944310 | 7.72298815935751  |
| Au  | 6.45352580306365                        | 5.70582504462040 | 7.71842015627621  |
| Au  | 2.05387281147417                        | 3.16884180901932 | 7.70813898487634  |
| 4.3 | <i>pd3_au-h_bridge_to_rim2_TS</i>       |                  |                   |
| H   | 7.06146662541887                        | 6.19285016364175 | 11.87184874723977 |
| Pd  | 9.50448156866995                        | 7.44277709023990 | 12.21846463340161 |
| Pd  | 10.87697235862197                       | 5.08989500885427 | 12.22026337893013 |
| Pd  | 8.14130534163021                        | 5.05483984601934 | 12.18382338220047 |
| Au  | 7.97389009818123                        | 1.54816717216480 | 10.12830001425665 |
| Au  | 5.00749161216614                        | 6.68882073248146 | 10.12141079349487 |
| Au  | 4.99327245584172                        | 1.57818051136662 | 10.16281286756222 |
| Au  | 6.38589766226578                        | 4.06325450153732 | 10.24814138562675 |
| Au  | 11.00809056388680                       | 6.72413766682925 | 10.06939879638968 |
| Au  | 9.47292739714596                        | 3.99338227595735 | 10.10393726564132 |
| Au  | 2.04505447208234                        | 1.53487750515158 | 10.13633432368660 |
| Au  | 7.89190380364103                        | 6.73251008049454 | 10.09456205671127 |
| Au  | 3.53821154792713                        | 4.07836674353061 | 10.16746951098018 |
| Au  | 6.46986294104307                        | 0.67480096941906 | 7.70231755728946  |
| Au  | 9.42341186011058                        | 5.77493042607887 | 7.72814249245806  |
| Au  | 3.52379835438439                        | 5.77332015714437 | 7.70515978361925  |
| Au  | 5.01378213550321                        | 3.23619208362911 | 7.75280569137442  |
| Au  | 7.94353964660316                        | 3.24041003521706 | 7.73671299876601  |
| Au  | 3.52625175398313                        | 0.66301274040804 | 7.70030629241879  |

|     |                                         |                  |                    |
|-----|-----------------------------------------|------------------|--------------------|
| Au  | 0.57173366884815                        | 0.66772602908977 | 7.70062295879909   |
| Au  | 6.48350075467458                        | 5.76868868348761 | 7.73057411653400   |
| Au  | 2.04590437122134                        | 3.22290488900351 | 7.70109360226697   |
| 4.4 | <i>pd3_au-h_bridge_to_three-fold_TS</i> |                  |                    |
| H   | 8.65693534911768                        | 6.16343446544463 | 13.00891484375449  |
| Pd  | 9.41591568767324                        | 7.36517715936847 | 12.20920877967768  |
| Pd  | 10.81885151345631                       | 4.93595781030256 | 12.21479588357137  |
| Pd  | 8.01466704033415                        | 4.93534757074826 | 12.21383168143980  |
| Au  | 7.93455644012839                        | 1.46814684225615 | 10.13732023387954  |
| Au  | 4.97952180974379                        | 6.57911722212550 | 10.13807090437838  |
| Au  | 4.98548636263441                        | 1.53754673718682 | 10.18202577326441  |
| Au  | 6.41158003709351                        | 3.99958864693591 | 10.19078526898063  |
| Au  | 10.97230535406553                       | 6.63639808840195 | 10.09038946517592  |
| Au  | 9.41252153203213                        | 3.92324001596626 | 10.10075054908244  |
| Au  | 2.02430552634756                        | 1.46670743874688 | 10.13335048860607  |
| Au  | 7.84541106281624                        | 6.64071498354453 | 10.09420402715418  |
| Au  | 3.55948744687801                        | 3.99625199431652 | 10.19274985731730  |
| Au  | 6.44089462480556                        | 0.61112792246201 | 7.71958882036022   |
| Au  | 9.40167524168280                        | 5.72387462300662 | 7.72131574807528   |
| Au  | 3.49289778714271                        | 5.71373243009534 | 7.72170076835768   |
| Au  | 4.97609731775696                        | 3.16956257366203 | 7.70332794846147   |
| Au  | 7.92385158204396                        | 3.17827341294221 | 7.72340435472018   |
| Au  | 3.51175067138107                        | 0.61362139625967 | 7.71992974117971   |
| Au  | 0.54676944691632                        | 0.60935340112994 | 7.71577021004244   |
| Au  | 6.45766083144425                        | 5.71514969761540 | 7.72260720903597   |
| Au  | 2.02795617817933                        | 3.17979772009862 | 7.72266809528243   |
| 4.5 | <i>pt3_cu-h_bridge_to_rim1_TS</i>       |                  |                    |
| H   | 6.18217598574459                        | 5.45757453187938 | 11.36863104883135  |
| Pt  | 8.29557830748673                        | 6.57580048373787 | 10.84628382208669  |
| Pt  | 9.56250512034488                        | 4.21659017754806 | 10.74303048988040  |
| Pt  | 6.88528863683717                        | 4.13393351412291 | 10.847244444647101 |
| Cu  | 6.90182642259576                        | 1.28401698850575 | 8.94856535439054   |
| Cu  | 4.33924875889324                        | 5.72309827531809 | 8.90932469326962   |
| Cu  | 4.34718033172665                        | 1.32386612118883 | 8.80337475373503   |
| Cu  | 5.59208151025800                        | 3.47768740906494 | 8.80588646913029   |
| Cu  | 9.56154359837137                        | 5.77459887814781 | 8.74970000242607   |
| Cu  | 8.20903374512083                        | 3.43060479735044 | 8.75218561859436   |
| Cu  | 1.77541479936690                        | 1.28443143034383 | 8.90754135667762   |
| Cu  | 6.88277159195107                        | 5.76019856958321 | 8.82439716079756   |
| Cu  | 3.11432120655786                        | 3.47155127888665 | 8.76934074047031   |
| Cu  | 5.63918017128215                        | 0.53323301783391 | 6.73399270235077   |
| Cu  | 8.20717192983149                        | 4.99250221266055 | 6.71561375895596   |
| Cu  | 3.06594028439905                        | 4.99501581275239 | 6.72189894005403   |
| Cu  | 4.35075165321193                        | 2.75700238271427 | 6.69902934094839   |
| Cu  | 6.92066083031581                        | 2.75118661785113 | 6.73525554771721   |
| Cu  | 3.04972567483085                        | 0.52438897179174 | 6.75256822053072   |
| Cu  | 0.47453311199336                        | 0.53060092976319 | 6.82849279408148   |
| Cu  | 5.63367001465917                        | 4.99917336046385 | 6.75346886091612   |
| Cu  | 1.76962227145958                        | 2.74962874102316 | 6.72259812403734   |
| 4.6 | <i>pt3_cu-h_bridge_to_three-fold_TS</i> |                  |                    |
| H   | 8.25364831314981                        | 4.41287262582883 | 11.76926199999996  |
| Pt  | 8.29557800000001                        | 6.57579999999999 | 10.84628399999996  |
| Pt  | 9.56250500000002                        | 4.21659000000002 | 10.74303100000000  |
| Pt  | 6.88528900000001                        | 4.13393400000001 | 10.84724399999993  |
| Cu  | 6.90182599999998                        | 1.28401700000000 | 8.94856500000004   |
| Cu  | 4.33924900000001                        | 5.72309800000001 | 8.90932499999997   |
| Cu  | 4.34717999999998                        | 1.32386599999999 | 8.80337399999999   |
| Cu  | 5.59208200000001                        | 3.47768700000002 | 8.80588599999997   |
| Cu  | 9.56154300000001                        | 5.77459900000002 | 8.74970000000006   |
| Cu  | 8.20903399999997                        | 3.43060499999998 | 8.75218600000007   |
| Cu  | 1.77541500000000                        | 1.28443100000000 | 8.90754099999996   |
| Cu  | 6.88277100000000                        | 5.76019899999998 | 8.82439700000003   |
| Cu  | 3.11432100000002                        | 3.47155100000000 | 8.76934099999994   |
| Cu  | 5.63917999999997                        | 0.53323300000001 | 6.73399300000003   |
| Cu  | 8.20717200000001                        | 4.99250200000000 | 6.71561399999994   |
| Cu  | 3.06594000000001                        | 4.99501599999998 | 6.72189900000000   |
| Cu  | 4.35075199999998                        | 2.75700199999999 | 6.69902899999995   |
| Cu  | 6.92066099999999                        | 2.75118700000001 | 6.73525599999997   |
| Cu  | 3.04972599999998                        | 0.52438900000002 | 6.75256799999993   |



|     |                                         |                  |                   |
|-----|-----------------------------------------|------------------|-------------------|
| Cu  | 0.47453300000001                        | 0.53060100000000 | 6.82849299999994  |
| Cu  | 5.63367000000002                        | 4.99917300000002 | 6.75346900000003  |
| Cu  | 1.76962199999998                        | 2.74962899999998 | 6.72259800000002  |
| 4.7 | <i>pd3_cu-h_bridge_to_rim3_TS</i>       |                  |                   |
| H   | 6.02542217541168                        | 5.48345076526584 | 10.40161564777503 |
| Pd  | 8.27901867905535                        | 6.61517025714059 | 10.87625417774139 |
| Pd  | 9.58564849123412                        | 4.20713392960822 | 10.79562042687943 |
| Pd  | 6.84615465635496                        | 4.12764861835905 | 10.87708269112152 |
| Cu  | 6.90482071739524                        | 1.28652307916985 | 8.90760704959829  |
| Cu  | 4.33873832143395                        | 5.72968827649031 | 8.88417002108000  |
| Cu  | 4.34569838569740                        | 1.32018055416669 | 8.77433712080494  |
| Cu  | 5.59472276797206                        | 3.48396304789939 | 8.77678925046311  |
| Cu  | 9.54013455231404                        | 5.76448065392639 | 8.79158159328335  |
| Cu  | 8.21069955394768                        | 3.45955289667249 | 8.79307483672783  |
| Cu  | 1.77261575950247                        | 1.28451814338982 | 8.88313456089477  |
| Cu  | 6.89667869904308                        | 5.75342745629212 | 8.85553807716839  |
| Cu  | 3.09539104453054                        | 3.48387748345930 | 8.75940609992977  |
| Cu  | 5.64060838723926                        | 0.52793559619892 | 6.73737386139232  |
| Cu  | 8.20695492474146                        | 4.99553603759918 | 6.73341372014400  |
| Cu  | 3.06224136538850                        | 5.00032835999169 | 6.72938868293763  |
| Cu  | 4.34692045354351                        | 2.76110531633950 | 6.69481743522132  |
| Cu  | 6.92791789658927                        | 2.75776071948194 | 6.73876298762256  |
| Cu  | 3.04871999972632                        | 0.52090878878153 | 6.75224526980997  |
| Cu  | 0.47856038598506                        | 0.53097757942113 | 6.79735462487412  |
| Cu  | 5.63724527440338                        | 5.00506817374162 | 6.75314409051836  |
| Cu  | 1.76492204725641                        | 2.75329184260046 | 6.72947872333198  |
| 4.8 | <i>pd3_cu-h_bridge_to_three-fold_TS</i> |                  |                   |
| H   | 7.55302960103290                        | 5.37695736083085 | 11.80097903771836 |
| Pd  | 8.27901867905535                        | 6.61517025714059 | 10.87625417774139 |
| Pd  | 9.58564849123412                        | 4.20713392960822 | 10.79562042687943 |
| Pd  | 6.84615465635496                        | 4.12764861835905 | 10.87708269112152 |
| Cu  | 6.90482071739524                        | 1.28652307916985 | 8.90760704959829  |
| Cu  | 4.33873832143395                        | 5.72968827649031 | 8.88417002108000  |
| Cu  | 4.34569838569740                        | 1.32018055416669 | 8.77433712080494  |
| Cu  | 5.59472276797206                        | 3.48396304789939 | 8.77678925046311  |
| Cu  | 9.54013455231404                        | 5.76448065392639 | 8.79158159328335  |
| Cu  | 8.21069955394768                        | 3.45955289667249 | 8.79307483672783  |
| Cu  | 1.77261575950247                        | 1.28451814338982 | 8.88313456089477  |
| Cu  | 6.89667869904308                        | 5.75342745629212 | 8.85553807716839  |
| Cu  | 3.09539104453054                        | 3.48387748345930 | 8.75940609992977  |
| Cu  | 5.64060838723926                        | 0.52793559619892 | 6.73737386139232  |
| Cu  | 8.20695492474146                        | 4.99553603759918 | 6.73341372014400  |
| Cu  | 3.06224136538850                        | 5.00032835999169 | 6.72938868293763  |
| Cu  | 4.34692045354351                        | 2.76110531633950 | 6.69481743522132  |
| Cu  | 6.92791789658927                        | 2.75776071948194 | 6.73876298762256  |
| Cu  | 3.04871999972632                        | 0.52090878878153 | 6.75224526980997  |
| Cu  | 0.47856038598506                        | 0.53097757942113 | 6.79735462487412  |
| Cu  | 5.63724527440338                        | 5.00506817374162 | 6.75314409051836  |
| Cu  | 1.76492204725641                        | 2.75329184260046 | 6.72947872333198  |

**5 Table S3**

*5.1 pt3\_au-h\_au-site4*

|    |                   |                  |                   |
|----|-------------------|------------------|-------------------|
| H  | 6.47696779724549  | 2.33427394922007 | 10.96873379952747 |
| Pt | 9.46463252954208  | 7.22977309654068 | 12.19665696700031 |
| Pt | 10.78774946429336 | 4.96052706520551 | 12.16509970257576 |
| Pt | 8.16100822767697  | 4.97839898324627 | 12.19988101151995 |
| Au | 7.98490781222947  | 1.45531113162704 | 10.20003760766518 |
| Au | 4.99086143682080  | 6.61131649423518 | 10.14740081198375 |
| Au | 4.89984638469307  | 1.53378863935074 | 10.32835056675472 |
| Au | 6.38123536841762  | 4.09367137249647 | 10.33765541808630 |
| Au | 11.01331582529917 | 6.65929083555474 | 10.01846030478219 |
| Au | 9.42174184527189  | 3.90018111313766 | 10.02680021025384 |
| Au | 2.02353284685017  | 1.47516043064297 | 10.14418997040920 |
| Au | 7.82457397726171  | 6.66640736940082 | 10.04682492071146 |
| Au | 3.55518367233063  | 4.01801093149266 | 10.22276730950753 |
| Au | 6.44619582172971  | 0.63594535645323 | 7.71181662182681  |
| Au | 9.40171029679856  | 5.73356262455426 | 7.71346306924855  |
| Au | 3.50830116050837  | 5.71594777190284 | 7.69742023319309  |
| Au | 4.98731131396405  | 3.17569666302495 | 7.77067043487431  |
| Au | 7.91641099768668  | 3.17410543842314 | 7.71713211422598  |
| Au | 3.52502778830060  | 0.63798184294280 | 7.70958674127813  |
| Au | 0.54360560919816  | 0.61959177117877 | 7.71939725326142  |
| Au | 6.45466729143366  | 5.70646883940578 | 7.71509524833687  |
| Au | 2.04165528483476  | 3.17572669250253 | 7.69960057796368  |

*5.2 pd3\_au-h\_au-site4*

|    |                   |                  |                   |
|----|-------------------|------------------|-------------------|
| H  | 6.50226271702453  | 2.36081688964980 | 10.91327318415810 |
| Pd | 9.50554018460631  | 7.30099758336789 | 12.22275718853778 |
| Pd | 10.87728393162659 | 4.94842438583495 | 12.18393066193066 |
| Pd | 8.15652644755399  | 4.95759295547510 | 12.22049596067385 |
| Au | 8.03081612304454  | 1.46861707829385 | 10.20765159596363 |
| Au | 5.02443687469151  | 6.63437351512085 | 10.13248189374472 |
| Au | 4.95041816216398  | 1.53010519585567 | 10.24478109864730 |
| Au | 6.43737028641141  | 4.11551338148708 | 10.25250177547121 |
| Au | 11.00847911578088 | 6.65417789887833 | 10.06017821599456 |
| Au | 9.46068846734808  | 3.96919296858081 | 10.06079703696095 |
| Au | 2.05773633176504  | 1.49566607051260 | 10.13071902458644 |
| Au | 7.89619922660783  | 6.66496900799095 | 10.09179072509278 |
| Au | 3.58423712848160  | 4.03557064328243 | 10.15068471005144 |
| Au | 6.47342166355477  | 0.64871271708704 | 7.71814362577106  |
| Au | 9.42779161418474  | 5.75868184573337 | 7.71307801729682  |
| Au | 3.53031344448197  | 5.75055475934320 | 7.70066893113299  |
| Au | 5.01105893900933  | 3.19586785534896 | 7.73098397721961  |
| Au | 7.94856328886011  | 3.20266636133763 | 7.72363947245094  |
| Au | 3.54264900482523  | 0.64967801287567 | 7.71620846740803  |
| Au | 0.56483143109973  | 0.64835983664318 | 7.71275467533433  |
| Au | 6.48418002898996  | 5.73810651598751 | 7.71983683176376  |
| Au | 2.05537470994455  | 3.19899467445975 | 7.69849582988851  |

*5.3 pt3\_cu-h\_cu-site4*

|    |                  |                   |                   |
|----|------------------|-------------------|-------------------|
| H  | 5.61820312857753 | 2.07361682070179  | 9.92798200635033  |
| Pt | 4.39368249295646 | -0.23204659393240 | 10.82554295467722 |
| Pt | 9.63740383462524 | 4.16548971198565  | 10.75873982629814 |
| Pt | 6.95115129385782 | 4.17179655618798  | 10.80876014532105 |
| Cu | 6.90168662988587 | 1.29432412318039  | 8.98219341418470  |
| Cu | 4.32869425022247 | 5.73257355167627  | 8.90643844809336  |
| Cu | 4.34014128648597 | 1.32567910844651  | 8.85839973268198  |
| Cu | 5.57934013667801 | 3.48890468378988  | 8.83190855846463  |
| Cu | 9.55988448712181 | 5.75838030074934  | 8.76733001336149  |
| Cu | 8.23240860447505 | 3.44611727976894  | 8.75436090252558  |
| Cu | 1.77106431918587 | 1.29030901394018  | 8.91102461267459  |
| Cu | 6.84912935421762 | 5.77560053893360  | 8.80989829813571  |
| Cu | 3.10013021008972 | 3.48023120166489  | 8.72206554482797  |
| Cu | 5.63352370529761 | 0.53459549685952  | 6.73826257804238  |
| Cu | 8.19838178458298 | 5.00179234462647  | 6.71714448252938  |
| Cu | 3.05803974950885 | 5.00656728720224  | 6.71501083269880  |
| Cu | 4.35162839581107 | 2.75516670496597  | 6.69439239100701  |
| Cu | 6.92010876300712 | 2.76057934773105  | 6.73216468465568  |
| Cu | 3.05263390235363 | 0.53908338011944  | 6.75776518328157  |

|                              |                   |                  |                    |
|------------------------------|-------------------|------------------|--------------------|
| Cu                           | 0.46080893402378  | 0.54243284714956 | 6.84105206045377   |
| Cu                           | 5.62262009861964  | 4.99418666366184 | 6.75247935729995   |
| Cu                           | 1.75950809460685  | 2.75198593348018 | 6.71205366613993   |
| 5.4 <i>pd3_cu-h_cu-site4</i> |                   |                  |                    |
| H                            | 5.59087263768511  | 2.05236507852794 | 9.85573388333886   |
| Pd                           | 8.23972575114291  | 6.54798399037638 | 10.84598091875206  |
| Pd                           | 9.62525584392553  | 4.18583456071291 | 10.82269691627151  |
| Pd                           | 6.88601918637351  | 4.19533884449150 | 10.84413809717222  |
| Cu                           | 6.90971833270471  | 1.28791869023502 | 8.95317426833917   |
| Cu                           | 4.34255089989655  | 5.73641129397388 | 8.87937139429053   |
| Cu                           | 4.34086380117994  | 1.32200085070227 | 8.81003874456970   |
| Cu                           | 5.59362923631591  | 3.49311634606080 | 8.80882331794037   |
| Cu                           | 9.53719314121267  | 5.74988111333511 | 8.80571800788311   |
| Cu                           | 8.22580986233688  | 3.47501548060249 | 8.80516480403971   |
| Cu                           | 1.77180016190841  | 1.28278346852404 | 8.87901358479729   |
| Cu                           | 6.88263799634756  | 5.76430084479629 | 8.81464374430235   |
| Cu                           | 3.07766946156335  | 3.49756708418435 | 8.74844757914595   |
| Cu                           | 5.64076149881944  | 0.52772272568935 | 6.73585704413021   |
| Cu                           | 8.20708329377145  | 4.99816103333937 | 6.72937033955719   |
| Cu                           | 3.05930483921992  | 5.00758107738673 | 6.72829673765964   |
| Cu                           | 4.34563410152382  | 2.76345818101739 | 6.69959312005415   |
| Cu                           | 6.93083763459324  | 2.76092982533289 | 6.73624593228146   |
| Cu                           | 3.05713568448693  | 0.53445419957871 | 6.74706215656279   |
| Cu                           | 0.46560051800345  | 0.54095882883143 | 6.81284260964152   |
| Cu                           | 5.63163144709436  | 4.99378890515969 | 6.74699332454085   |
| Cu                           | 1.75980568472789  | 2.75563216200141 | 6.72800767014345   |
| 5.5 <i>pt3_au_6layers</i>    |                   |                  |                    |
| Pt                           | 10.72892865185230 | 4.96802993184437 | 19.42953356674469  |
| Pt                           | 8.10582955000815  | 4.96862680802939 | 19.42893458742403  |
| Pt                           | 9.41652940128048  | 7.24109725767745 | 19.43070948718485  |
| Au                           | 7.93474271310993  | 1.45698593495791 | 17.399973692255660 |
| Au                           | 11.01594641035518 | 6.65039501204252 | 17.28618277411758  |
| Au                           | 4.97863052002246  | 6.57500160129296 | 17.39993546630619  |
| Au                           | 6.40783256044492  | 3.98654573502475 | 17.52796165716694  |
| Au                           | 9.41328701559626  | 3.86268361798013 | 17.29098178349671  |
| Au                           | 4.98355483023880  | 1.52916047248000 | 17.52820405151797  |
| Au                           | 2.02038355996970  | 1.45534776237376 | 17.39751181090123  |
| Au                           | 7.80131622032696  | 6.65408377294525 | 17.29261006609013  |
| Au                           | 3.56646442274680  | 3.98525027848703 | 17.52769344169358  |
| Au                           | 6.43711502109739  | 0.61422600782165 | 14.95626067624327  |
| Au                           | 9.40060030351134  | 5.71602174256630 | 14.96815408221196  |
| Au                           | 3.49894052720991  | 5.70239754794779 | 14.95588633121453  |
| Au                           | 4.97662659298263  | 3.16455979004953 | 15.01642579665604  |
| Au                           | 7.91237862535998  | 3.16635473791745 | 14.95923002447126  |
| Au                           | 3.50943537025128  | 0.61446357693746 | 14.95629558946592  |
| Au                           | 0.54394078554667  | 0.60329431384419 | 14.96060286486797  |
| Au                           | 6.44766987273362  | 5.70554505011756 | 14.96027363505304  |
| Au                           | 2.03595296131799  | 3.16355456133937 | 14.95611998200569  |
| Au                           | 10.87900700000000 | 4.86678000000002 | 12.55009900000005  |
| Au                           | 4.97582700000000  | 4.86676900000000 | 12.55009900000005  |
| Au                           | 6.45157400000000  | 2.31063900000000 | 12.55009900000005  |
| Au                           | 9.40320800000002  | 2.31061899999998 | 12.55009900000005  |
| Au                           | 7.92737400000002  | 4.86679999999998 | 12.55009900000005  |
| Au                           | 3.50002699999999  | 2.31060800000002 | 12.55009900000005  |
| Au                           | 12.35480900000002 | 7.42294100000000 | 12.55009900000005  |
| Au                           | 9.40317300000000  | 7.42296000000001 | 12.55009900000005  |
| Au                           | 6.45162700000002  | 7.42292999999998 | 12.55009900000005  |
| Au                           | 7.92736799999998  | 1.45858900000001 | 10.14010000000005  |
| Au                           | 10.87896700000004 | 6.57091000000002 | 10.14010000000005  |
| Au                           | 4.97578600000004  | 6.57090000000001 | 10.14010000000005  |
| Au                           | 6.45162100000004  | 4.01471900000002 | 10.14010000000005  |
| Au                           | 9.40316799999999  | 4.01474999999999 | 10.14010000000005  |
| Au                           | 4.97582099999999  | 1.45855899999999 | 10.14010000000005  |
| Au                           | 2.02418599999998  | 1.45857800000000 | 10.14010000000005  |
| Au                           | 7.92742099999999  | 6.57088000000000 | 10.14010000000005  |
| Au                           | 3.49998699999999  | 4.01473899999998 | 10.14010000000005  |
| Au                           | 6.45161499999997  | 0.60650799999999 | 7.73010000000004   |
| Au                           | 9.40321400000003  | 5.71883000000001 | 7.73010000000004   |
| Au                           | 3.50003300000003  | 5.71881899999999 | 7.73010000000004   |

|                               |                    |                   |                    |
|-------------------------------|--------------------|-------------------|--------------------|
| Au                            | 4.975779999999997  | 3.162688999999999 | 7.730100000000004  |
| Au                            | 7.927415000000001  | 3.162669000000003 | 7.730100000000004  |
| Au                            | 3.499980000000002  | 0.606528000000001 | 7.730100000000004  |
| Au                            | 0.548432999999997  | 0.606497999999998 | 7.730100000000004  |
| Au                            | 6.451580000000001  | 5.718850000000002 | 7.730100000000004  |
| Au                            | 2.024233000000001  | 3.162658000000001 | 7.730100000000004  |
| Au                            | 10.879007000000000 | 4.866780000000002 | 5.320100000000003  |
| Au                            | 4.975827000000000  | 4.866769000000000 | 5.320100000000003  |
| Au                            | 6.451574000000000  | 2.310639000000000 | 5.320100000000003  |
| Au                            | 9.403208000000002  | 2.310618999999998 | 5.320100000000003  |
| Au                            | 7.927374000000002  | 4.866799999999998 | 5.320100000000003  |
| Au                            | 3.500026999999999  | 2.310608000000002 | 5.320100000000003  |
| Au                            | 12.354809000000002 | 7.422941000000000 | 5.320100000000003  |
| Au                            | 9.403173000000000  | 7.422960000000001 | 5.320100000000003  |
| Au                            | 6.451627000000002  | 7.422929999999998 | 5.320100000000003  |
| 5.6 pt3_au_6layers-h_au-site1 |                    |                   |                    |
| H                             | 7.899328999999997  | 3.178050999999998 | 18.197796000000000 |
| Pt                            | 10.730929000000000 | 4.967597000000002 | 19.412041000000007 |
| Pt                            | 8.104826000000001  | 4.968481000000001 | 19.415886000000006 |
| Pt                            | 9.416041000000002  | 7.243631999999998 | 19.411572999999990 |
| Au                            | 7.894982000000000  | 1.480673000000001 | 17.490356000000004 |
| Au                            | 10.999721999999999 | 6.642285000000001 | 17.265833000000001 |
| Au                            | 4.980149000000000  | 6.528107999999999 | 17.491215000000001 |
| Au                            | 6.412406999999998  | 3.989981999999999 | 17.494616999999996 |
| Au                            | 9.410735000000000  | 3.881795000000001 | 17.270904999999989 |
| Au                            | 4.989079000000002  | 1.528162000000003 | 17.492200999999990 |
| Au                            | 2.080674999999998  | 1.493031000000001 | 17.484158000000006 |
| Au                            | 7.815065999999998  | 6.644526000000001 | 17.271133000000006 |
| Au                            | 3.566448999999999  | 3.992245999999997 | 17.491960999999990 |
| Au                            | 6.450537000000000  | 0.619267000000000 | 14.959823999999991 |
| Au                            | 9.401274000000002  | 5.716672999999999 | 14.940660000000001 |
| Au                            | 3.510129000000001  | 5.712156999999999 | 14.960968000000008 |
| Au                            | 4.976863000000003  | 3.163841000000002 | 14.993640999999996 |
| Au                            | 7.916943999999998  | 3.151528999999998 | 14.965238000000003 |
| Au                            | 3.497427000000000  | 0.619596000000000 | 14.960077999999997 |
| Au                            | 0.546158000000000  | 0.602034999999999 | 14.946261999999990 |
| Au                            | 6.439107999999998  | 5.711816999999998 | 14.964829999999993 |
| Au                            | 2.033295999999997  | 3.154315999999998 | 14.960236000000003 |
| 5.7 pt3_au_6layers-h_au-site2 |                    |                   |                    |
| H                             | 9.429334000000003  | 2.298051000000003 | 18.067794999999990 |
| Pt                            | 10.730929000000000 | 4.967597000000002 | 19.412041000000007 |
| Pt                            | 8.104826000000001  | 4.968481000000001 | 19.415886000000006 |
| Pt                            | 9.416041000000002  | 7.243631999999998 | 19.411572999999990 |
| Au                            | 7.894982000000000  | 1.480673000000001 | 17.490356000000004 |
| Au                            | 10.999721999999999 | 6.642285000000001 | 17.265833000000001 |
| Au                            | 4.980149000000000  | 6.528107999999999 | 17.491215000000001 |
| Au                            | 6.412406999999998  | 3.989981999999999 | 17.494616999999996 |
| Au                            | 9.410735000000000  | 3.881795000000001 | 17.270904999999989 |
| Au                            | 4.989079000000002  | 1.528162000000003 | 17.492200999999990 |
| Au                            | 2.080674999999998  | 1.493031000000001 | 17.484158000000006 |
| Au                            | 7.815065999999998  | 6.644526000000001 | 17.271133000000006 |
| Au                            | 3.566448999999999  | 3.992245999999997 | 17.491960999999990 |
| Au                            | 6.450537000000000  | 0.619267000000000 | 14.959823999999991 |
| Au                            | 9.401274000000002  | 5.716672999999999 | 14.940660000000001 |
| Au                            | 3.510129000000001  | 5.712156999999999 | 14.960968000000008 |
| Au                            | 4.976863000000003  | 3.163841000000002 | 14.993640999999996 |
| Au                            | 7.916943999999998  | 3.151528999999998 | 14.965238000000003 |
| Au                            | 3.497427000000000  | 0.619596000000000 | 14.960077999999997 |
| Au                            | 0.546158000000000  | 0.602034999999999 | 14.946261999999990 |
| Au                            | 6.439107999999998  | 5.711816999999998 | 14.964829999999993 |
| Au                            | 2.033295999999997  | 3.154315999999998 | 14.960236000000003 |
| 5.8 pt3_au_6layers-h_au-site3 |                    |                   |                    |
| H                             | 0.56590796323150   | 0.61332237526424  | 18.20014151593645  |
| Pt                            | 10.73092938415266  | 4.96759727790484  | 19.41203987331100  |
| Pt                            | 8.10482626197847   | 4.96848085999555  | 19.41588673575558  |
| Pt                            | 9.41604144097281   | 7.24363195924373  | 19.41157344394058  |
| Au                            | 7.89498173331652   | 1.48067310832581  | 17.49035564308764  |
| Au                            | 10.99972192088047  | 6.64228481533600  | 17.26583340684090  |
| Au                            | 4.98014902601011   | 6.52810751932434  | 17.49121532657149  |

|     |                   |                  |                   |
|-----|-------------------|------------------|-------------------|
| Au  | 6.41240754966295  | 3.98998193707230 | 17.49461728180268 |
| Au  | 9.41073552606751  | 3.88179467723953 | 17.27090383388303 |
| Au  | 4.98907969395572  | 1.52816239873462 | 17.49220006256284 |
| Au  | 2.08067517170661  | 1.49303088758520 | 17.48415736889414 |
| Au  | 7.81506615757662  | 6.64452531870375 | 17.27113258909416 |
| Au  | 3.56644875271012  | 3.99224591184331 | 17.49195967297657 |
| Au  | 6.45053677964886  | 0.61926707296784 | 14.95982333031913 |
| Au  | 9.40127328971757  | 5.71667289107746 | 14.94066008819862 |
| Au  | 3.51012914671098  | 5.71215708083383 | 14.96096800582189 |
| Au  | 4.97686334020806  | 3.16384104528716 | 14.99364118871697 |
| Au  | 7.91694409133448  | 3.15152919999544 | 14.96523776186448 |
| Au  | 3.49742677638479  | 0.61959591627626 | 14.96007808864135 |
| Au  | 0.54615755462613  | 0.60203478466757 | 14.94626231760073 |
| Au  | 6.43910804152325  | 5.71181691940924 | 14.96482993981499 |
| Au  | 2.03329641098149  | 3.15431570434180 | 14.96023570089287 |
| 5.9 | <i>pt3_au4x4</i>  |                  |                   |
| Pt  | 10.33339954978684 | 7.07989515593238 | 12.05995337901622 |
| Pt  | 11.66068147080884 | 4.78046330465107 | 12.06035551156757 |
| Pt  | 9.00624590098057  | 4.78123540704100 | 12.06084793713458 |
| Au  | 7.27249155659041  | 3.77883446011288 | 10.22922196688863 |
| Au  | 2.96161858528647  | 1.28933914048070 | 10.12294093084441 |
| Au  | 5.89391857417557  | 1.28982406089364 | 10.12295004296325 |
| Au  | 4.42839256843698  | 3.82784825710181 | 10.12390572097793 |
| Au  | 13.39227665473753 | 3.77731165599253 | 10.22782418508585 |
| Au  | 8.81707633497279  | 1.22650583165542 | 10.10758248154838 |
| Au  | 11.84414498896425 | 1.22498895036948 | 10.10651626256431 |
| Au  | 10.33244067180777 | 3.61042110070883 | 9.99978635872088  |
| Au  | 10.33143674749017 | 9.07853277579356 | 10.22289751627758 |
| Au  | 5.83438271654662  | 6.39450915260971 | 10.10661275170319 |
| Au  | 8.65517493123543  | 6.51360924827520 | 9.99904916307965  |
| Au  | 7.34600263463168  | 9.01520787153586 | 10.10920110431326 |
| Au  | 16.23486208693734 | 8.95243497325002 | 10.08335012953826 |
| Au  | 12.00828293393242 | 6.51249263087418 | 9.99790217057858  |
| Au  | 14.82856757484640 | 6.39394895520929 | 10.10653632263761 |
| Au  | 13.31603128062269 | 9.01494584219393 | 10.10890658929928 |
| Au  | 5.90445472888660  | 2.98787941852107 | 7.70143429953141  |
| Au  | 1.47965334747620  | 0.43261325392379 | 7.67392306269532  |
| Au  | 4.42737317658398  | 0.43269595485389 | 7.69956550057512  |
| Au  | 2.95168706133857  | 2.98670542168420 | 7.70118486246480  |
| Au  | 11.82946555968559 | 2.99255897115438 | 7.69161622215539  |
| Au  | 7.37476628399838  | 0.43365943374901 | 7.67393328149157  |
| Au  | 10.33069016088382 | 0.44194525358192 | 7.68918697927654  |
| Au  | 8.83441927141149  | 2.99321695950810 | 7.69168323310176  |
| Au  | 8.87154580196647  | 8.11672141407730 | 7.69086302690509  |
| Au  | 4.42767823892494  | 5.53809720318459 | 7.67411398617899  |
| Au  | 7.37471397921299  | 5.51972938990773 | 7.69125951244957  |
| Au  | 5.91303076695653  | 8.09440419824218 | 7.68819828878198  |
| Au  | 14.74910616487530 | 8.09473004494606 | 7.68864642307214  |
| Au  | 10.33143955018954 | 5.54414999801277 | 7.72920161101894  |
| Au  | 13.28893959112865 | 5.51875069876709 | 7.69076753961614  |
| Au  | 11.79155966339571 | 8.11679572883275 | 7.69023775155638  |
| Au  | 1.47501300000001  | 2.13410900000003 | 5.32007399999992  |
| Au  | 4.42740800000006  | 2.13410900000003 | 5.32007399999992  |
| Au  | 2.95081499999996  | 4.69027800000000 | 5.32007399999992  |
| Au  | 5.90321000000001  | 4.69027800000000 | 5.32007399999992  |
| Au  | 7.37900300000001  | 2.13410900000003 | 5.32007399999992  |
| Au  | 10.33139800000006 | 2.13410900000003 | 5.32007399999992  |
| Au  | 8.85480499999997  | 4.69027800000000 | 5.32007399999992  |
| Au  | 11.80719899999996 | 4.69027800000000 | 5.32007399999992  |
| Au  | 4.42701299999997  | 7.24710900000000 | 5.32007399999992  |
| Au  | 7.37940800000002  | 7.24710900000000 | 5.32007399999992  |
| Au  | 5.90281500000005  | 9.80327800000004 | 5.32007399999992  |
| Au  | 8.85521000000001  | 9.80327800000004 | 5.32007399999992  |
| Au  | 10.33100299999997 | 7.24710900000000 | 5.32007399999992  |
| Au  | 13.28339800000002 | 7.24710900000000 | 5.32007399999992  |
| Au  | 11.80680500000005 | 9.80327800000004 | 5.32007399999992  |
| Au  | 14.75919800000000 | 9.80327800000004 | 5.32007399999992  |
| Au  | 7.37901299999998  | 3.83821900000001 | 2.91009800000009  |
| Au  | 2.95160500000001  | 1.28205400000000 | 2.91009800000009  |

|                                  |                   |                  |                   |
|----------------------------------|-------------------|------------------|-------------------|
| Au                               | 5.90321000000003  | 1.28205400000000 | 2.91009800000009  |
| Au                               | 4.42740700000000  | 3.83821900000001 | 2.91009800000009  |
| Au                               | 13.28300299999998 | 3.83821900000001 | 2.91009800000009  |
| Au                               | 8.85559500000001  | 1.28205400000000 | 2.91009800000009  |
| Au                               | 11.80719899999998 | 1.28205400000000 | 2.91009800000009  |
| Au                               | 10.33139600000003 | 3.83821900000001 | 2.91009800000009  |
| Au                               | 10.33101300000002 | 8.95121899999998 | 2.91009800000009  |
| Au                               | 5.90360499999997  | 6.39505399999997 | 2.91009800000009  |
| Au                               | 8.85520999999999  | 6.39505399999997 | 2.91009800000009  |
| Au                               | 7.37940699999995  | 8.95121899999998 | 2.91009800000009  |
| Au                               | 16.23500300000002 | 8.95121899999998 | 2.91009800000009  |
| Au                               | 11.80759400000001 | 6.39505399999997 | 2.91009800000009  |
| Au                               | 14.75919799999997 | 6.39505399999997 | 2.91009800000009  |
| Au                               | 13.28339599999999 | 8.95121899999998 | 2.91009800000009  |
| <i>5.10 pt3_au4x4-h_au-site1</i> |                   |                  |                   |
| H                                | 8.79938999999998  | 2.97965800000000 | 10.92196966339291 |
| Pt                               | 10.48461339973912 | 7.24479406483084 | 12.05727097886177 |
| Pt                               | 11.74659249937634 | 4.92527181314406 | 12.13523977670506 |
| Pt                               | 9.10365697307389  | 4.99202930306157 | 11.93703689211915 |
| Au                               | 7.14766019819801  | 3.84118880155906 | 10.47951463189782 |
| Au                               | 2.94147476195548  | 1.35466918008734 | 10.11600601436038 |
| Au                               | 5.89410810335416  | 1.33494820672396 | 10.11076690758730 |
| Au                               | 4.38859183811982  | 3.86400675716627 | 10.11839541833858 |
| Au                               | 13.37167652254271 | 3.81783448088800 | 10.24584193353037 |
| Au                               | 8.82757562193861  | 1.24012814283976 | 10.09414628467377 |
| Au                               | 11.82450563813532 | 1.25122275697234 | 10.08182615517956 |
| Au                               | 10.43556398343691 | 3.67207909917956 | 10.01324402421131 |
| Au                               | 10.33281805122662 | 9.17548479857087 | 10.16640132677919 |
| Au                               | 5.88660734476299  | 6.40757040152497 | 10.11470420870210 |
| Au                               | 8.72724636608937  | 6.72305973274366 | 9.95769536194231  |
| Au                               | 7.31039958540604  | 9.09935659393704 | 10.07864241759030 |
| Au                               | 16.22113772203425 | 8.95033181581152 | 10.05490906316663 |
| Au                               | 12.00911789355695 | 6.51171049674475 | 9.94143846427552  |
| Au                               | 14.84822951738822 | 6.40694741856763 | 10.09793126418663 |
| Au                               | 13.31195066873536 | 9.02465467384258 | 10.08830985728778 |
| Au                               | 5.94251385306744  | 3.02437764353695 | 7.72790643092522  |
| Au                               | 1.47461121014096  | 0.46922735237363 | 7.65532682110435  |
| Au                               | 4.44352923266166  | 0.48896057482589 | 7.68551513086398  |
| Au                               | 2.94956131669544  | 3.01042643821607 | 7.69473587329111  |
| Au                               | 11.81671694411474 | 3.00721748516129 | 7.68283544439826  |
| Au                               | 7.37617466293767  | 0.45272186298733 | 7.67253609346733  |
| Au                               | 10.32078185302902 | 0.43866026636218 | 7.67862505796992  |
| Au                               | 8.84800589477054  | 3.01314199480955 | 7.69309789577027  |
| Au                               | 8.86995086960372  | 8.18750702984115 | 7.63340412280231  |
| Au                               | 4.45253145121693  | 5.54111209282237 | 7.67329930907672  |
| Au                               | 7.40512796075120  | 5.52683606596068 | 7.73121093789055  |
| Au                               | 5.91895211701873  | 8.08563928063187 | 7.68683381289063  |
| Au                               | 14.74556439301590 | 8.08478836729306 | 7.67980501539976  |
| Au                               | 10.31864922942036 | 5.55798373820305 | 7.72913879483101  |
| Au                               | 13.30430041674963 | 5.52357498766063 | 7.67540161502326  |
| Au                               | 11.78685547399702 | 8.13407101872892 | 7.67366524204621  |
| <i>5.11 pt3_au4x4-h_au-site2</i> |                   |                  |                   |
| H                                | 10.36940200000000 | 2.12965900000002 | 10.85391596243195 |
| Pt                               | 10.33403924971693 | 7.10157525435173 | 12.05003173934953 |
| Pt                               | 11.66383130947626 | 4.82184442227075 | 12.09992030382532 |
| Pt                               | 9.01099806611463  | 4.81849555839927 | 12.10632478162987 |
| Au                               | 7.27451768238875  | 3.80495335686077 | 10.24785289565135 |
| Au                               | 2.96028831541271  | 1.29957836797551 | 10.10462479980046 |
| Au                               | 5.91034186988614  | 1.30188187095024 | 10.10558990417508 |
| Au                               | 4.43183018062900  | 3.82517906567844 | 10.12849555296895 |
| Au                               | 13.39788126136476 | 3.80520926324277 | 10.24108036106715 |
| Au                               | 8.82135039906182  | 1.24358337253170 | 10.18654971323489 |
| Au                               | 11.86616185960340 | 1.23607866109988 | 10.18862609594086 |
| Au                               | 10.33462918219075 | 3.78102657424085 | 9.94508385069174  |
| Au                               | 10.33882933359901 | 9.09342160163139 | 10.21153270955818 |
| Au                               | 5.83698409122566  | 6.39335085130356 | 10.10839366722736 |
| Au                               | 8.65698723673213  | 6.51473930244147 | 9.99362201761007  |
| Au                               | 7.35838524272163  | 9.02156019493103 | 10.09094676857135 |
| Au                               | 16.23857173755679 | 8.94528194872434 | 10.06158701848899 |

|                                  |                   |                  |                   |
|----------------------------------|-------------------|------------------|-------------------|
| Au                               | 12.01363234100291 | 6.52323635875594 | 9.99300161167986  |
| Au                               | 14.83250980599403 | 6.39364389858428 | 10.10866056949384 |
| Au                               | 13.31673309137105 | 9.03110175444628 | 10.09335683108780 |
| Au                               | 5.90396782062532  | 2.98835156143143 | 7.70519547779777  |
| Au                               | 1.45950685592306  | 0.44906569784708 | 7.68620968809795  |
| Au                               | 4.42983861956115  | 0.43251139157346 | 7.68759708314445  |
| Au                               | 2.95368542675334  | 2.98696436437968 | 7.70430335226854  |
| Au                               | 11.83503733839410 | 2.99609129356734 | 7.68838215899522  |
| Au                               | 7.40018592171197  | 0.45170155417504 | 7.68640324411609  |
| Au                               | 10.33318374502661 | 0.44691871904423 | 7.69241153053587  |
| Au                               | 8.83117412629428  | 2.99635304398518 | 7.68904879133392  |
| Au                               | 8.87222078418941  | 8.12828505717236 | 7.68616328144824  |
| Au                               | 4.42834186513907  | 5.53415665494945 | 7.67428872456443  |
| Au                               | 7.36897970686757  | 5.52686292152250 | 7.69088081426912  |
| Au                               | 5.91494428564060  | 8.09567849347493 | 7.68858619610123  |
| Au                               | 14.74952269388447 | 8.09567105003581 | 7.68914230369590  |
| Au                               | 10.33307364873380 | 5.56114463360687 | 7.70824874027867  |
| Au                               | 13.29580367357702 | 5.52794604810932 | 7.69040091836985  |
| Au                               | 11.79401592255651 | 8.13165296913102 | 7.68591154202869  |
| <i>5.12 pt3_au4x4-h_au-site3</i> |                   |                  |                   |
| H                                | 4.42682275333615  | 7.23914539761436 | 11.00112717915295 |
| Pt                               | 10.33168980188240 | 7.08499627060560 | 12.06178941474459 |
| Pt                               | 11.65941974352458 | 4.78466117305851 | 12.05426728496032 |
| Pt                               | 9.00625072246110  | 4.78364836859867 | 12.05502965107270 |
| Au                               | 7.27717280224193  | 3.76680871446225 | 10.22401527361454 |
| Au                               | 2.95868786954351  | 1.28013495162715 | 10.13112737023754 |
| Au                               | 5.89575526911222  | 1.28103432688986 | 10.13179004902243 |
| Au                               | 4.42724734932950  | 3.79403450152133 | 10.10219214806465 |
| Au                               | 13.38581318517787 | 3.76479161964920 | 10.22261624017651 |
| Au                               | 8.82187347958152  | 1.23819118741231 | 10.10216584157754 |
| Au                               | 11.83973215845879 | 1.23763805721292 | 10.10090633733751 |
| Au                               | 10.33150522540401 | 3.63409128393640 | 9.98402585218156  |
| Au                               | 10.33149915446174 | 9.07442055490891 | 10.21998256291987 |
| Au                               | 5.86961512248619  | 6.35437105134450 | 10.20753053828955 |
| Au                               | 8.65998651123306  | 6.51129273091540 | 9.99634902894830  |
| Au                               | 7.35726984789049  | 9.02442438846447 | 10.08441169362234 |
| Au                               | 16.23535358045867 | 8.99292706968845 | 10.16069384011301 |
| Au                               | 12.00194091374259 | 6.51163388903084 | 9.99494639933130  |
| Au                               | 14.79222017219323 | 6.35372114525269 | 10.20765290649868 |
| Au                               | 13.30481766848243 | 9.02455526201584 | 10.08517008213501 |
| Au                               | 5.90570175937299  | 2.98240343038448 | 7.70169888704106  |
| Au                               | 1.47734125108769  | 0.43867543520338 | 7.67252571996138  |
| Au                               | 4.42737740402556  | 0.42855505811941 | 7.70248325915604  |
| Au                               | 2.94961153715201  | 2.98239040030630 | 7.70116581829784  |
| Au                               | 11.82520160693518 | 2.99467266646378 | 7.68272651391774  |
| Au                               | 7.37650244810048  | 0.43855421144875 | 7.67260852436254  |
| Au                               | 10.32994954923383 | 0.41011590742600 | 7.70722835462954  |
| Au                               | 8.83716601509336  | 2.99478246215150 | 7.68313053254023  |
| Au                               | 8.86941414504136  | 8.11216539877857 | 7.68998494797984  |
| Au                               | 4.42745770213584  | 5.53901579610386 | 7.68659836851479  |
| Au                               | 7.34344937187033  | 5.52920626390443 | 7.71468128585520  |
| Au                               | 5.90613436371796  | 8.09053521796027 | 7.69729343918382  |
| Au                               | 14.75664051427727 | 8.09017165612947 | 7.69717785152086  |
| Au                               | 10.33115301798554 | 5.54188004960000 | 7.71180949721861  |
| Au                               | 13.31882463571017 | 5.52817179349313 | 7.71445145137029  |
| Au                               | 11.79444701082949 | 8.11206072818263 | 7.68931880140717  |
